# Supplementary material for: Mechanistic study of attenuation of monosodium glutamate mixed high lipid diet induced systemic damage in rats by Coccinia grandis
Source: PubMed Central journal article supplement (PMC7508805; doi:10.1038/s41598-020-72076-6), 2020-09-22
Supplement: 41598_2020_72076_MOESM1_ESM.pdf [file 41598_2020_72076_MOESM1_ESM.pdf]

**Mechanistic study of attenuation of monosodium glutamate mixed high lipid diet induced systemic damage in rats by *Coccinia grandis***

**Arnab Banerjee<sup>1</sup>, Debasmita Das<sup>1</sup>, Rajarshi Paul<sup>1</sup>, Sandipan Roy<sup>1</sup>, Ujjal Das<sup>2</sup>, Samrat Saha<sup>2</sup>, Sanjit Dey<sup>2</sup>, Arghya Adhikary<sup>3</sup>, Sandip Mukherjee<sup>1</sup>, Bithin Kumar Maji<sup>1\*</sup>**

<sup>1</sup>Department of Physiology (UG & PG), Serampore College, 9 William Carey Road, Serampore, Hooghly-712201, West Bengal, India

<sup>2</sup>Department of Physiology, University College of Science, Technology and Agriculture, University of Calcutta, 92 Acharya Prafulla Chandra Road, Kolkata-700009, West Bengal, India

<sup>3</sup>Centre for Research in Nanoscience and Nanotechnology, Acharya Prafulla Chandra Roy Siksha Prangan, University of Calcutta, JD-2, Sector-III, Saltlake City, Kolkata-700098, West Bengal, India

\*Corresponding author: Dr Bithin Kumar Maji

Designation: Associate Professor

Address: Department of Physiology (UG & PG), Serampore College, 9 William Carey Road, Serampore, Hooghly-712201, West Bengal, India

E-mail id: bm\_scp@yahoo.in; Mobile: +91- 9433509890

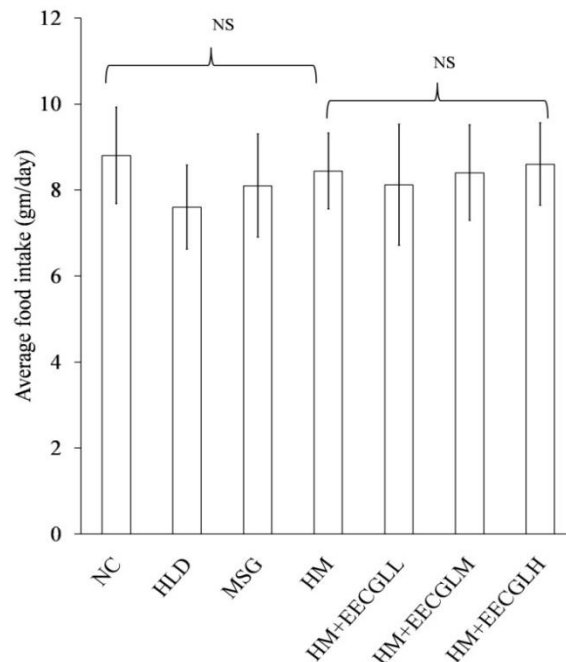

**Supplemental Fig. S1:** Average food intake among different groups of animals including NC, HLD, MSG, HM and EECGLs. Statistical comparison by Kruskal-Wallis nonparametric ANOVA test [not significant: NS]. Significance level based on Mann-Whitney U multiple comparison test: NC vs. HLD/MSG/HM: NS; HM vs. HM+EECGLL/EECGLM/EECGLH: NS.

**A**

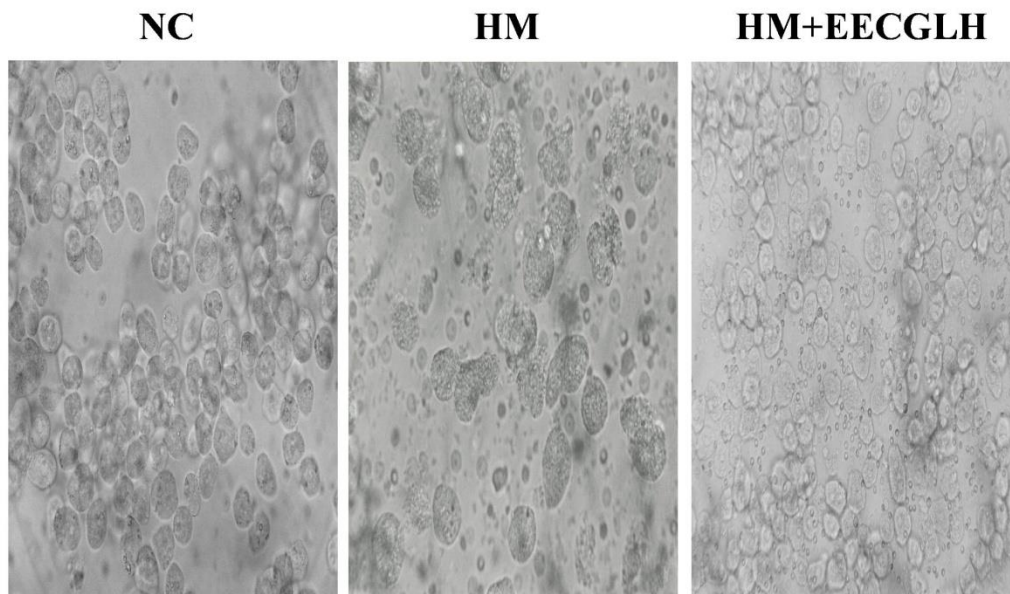

**B**

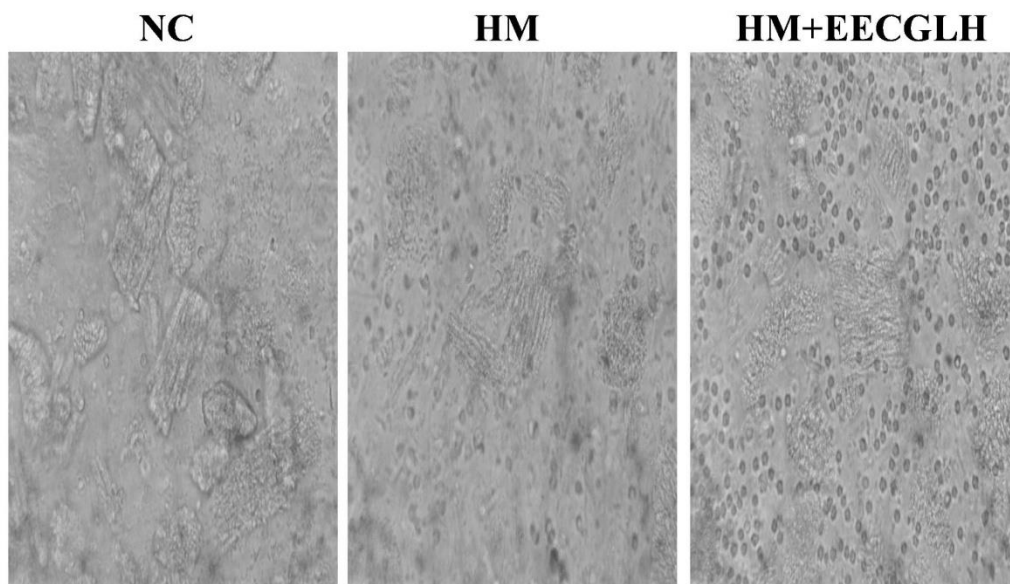

**Supplemental Fig. S2:** Isolated hepatocytes (A) and cardiomyocytes (B) of NC, HM and HM+EECGLH group.

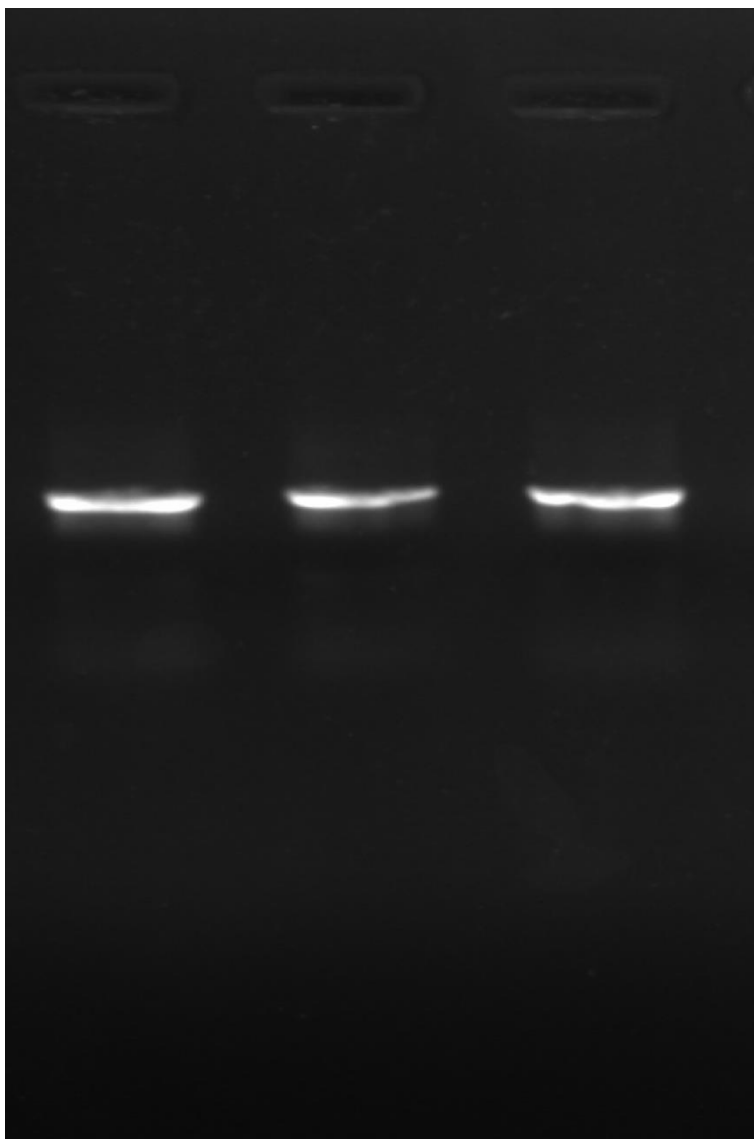

**Supplemental Fig. S3:** Full length photograph of 1.8% agarose gel with eNOS expression as PCR product of isolated hepatocytes after electrophoresis.

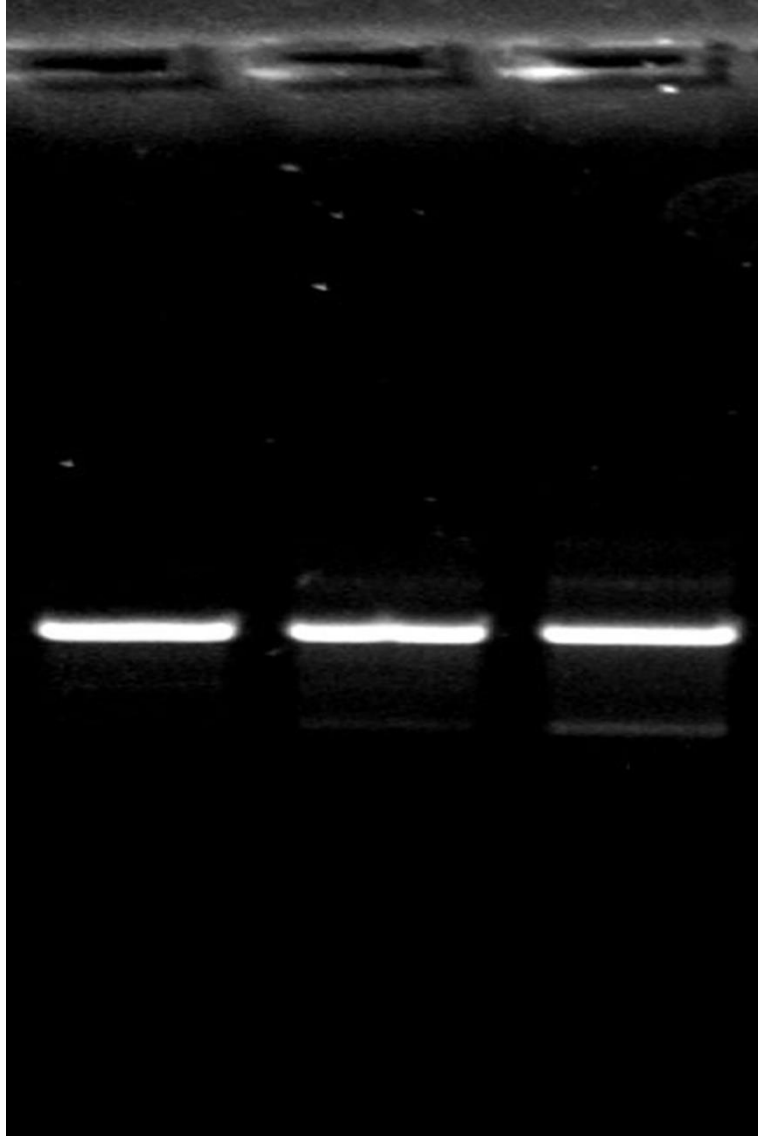

**Supplemental Fig. S4:** Full length photograph of 1% agarose gel with iNOS expression as PCR product of isolated hepatocytes after electrophoresis.

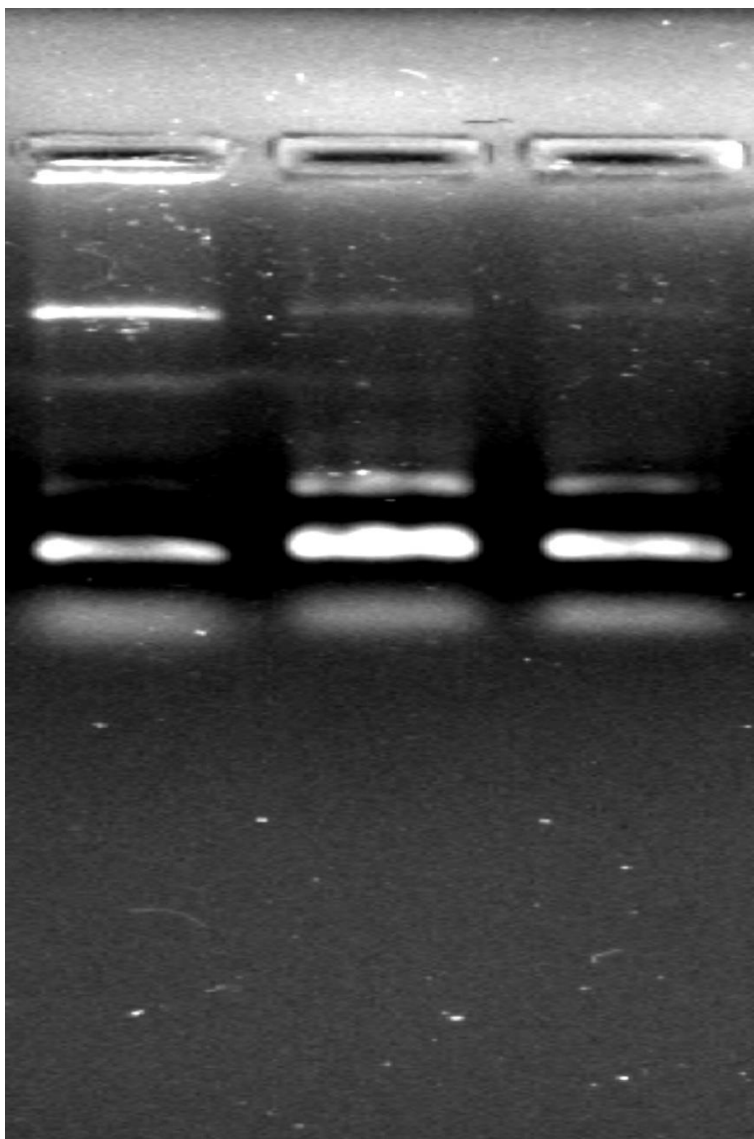

**Supplemental Fig. S5:** Full length photograph of 1.8% agarose gel with TNF- $\alpha$  expression as PCR product of isolated hepatocytes after electrophoresis.

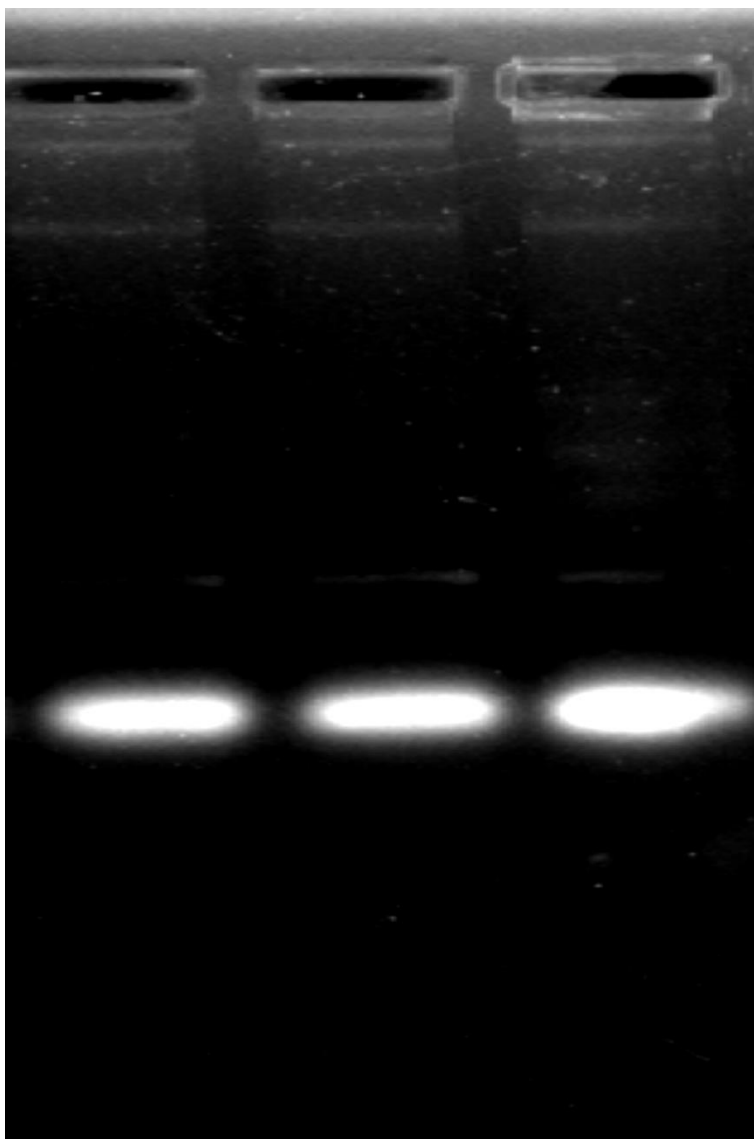

**Supplemental Fig. S6:** Full length photograph of 1.8% agarose gel with  $\beta$ -actin expression as PCR product of isolated hepatocytes after electrophoresis.

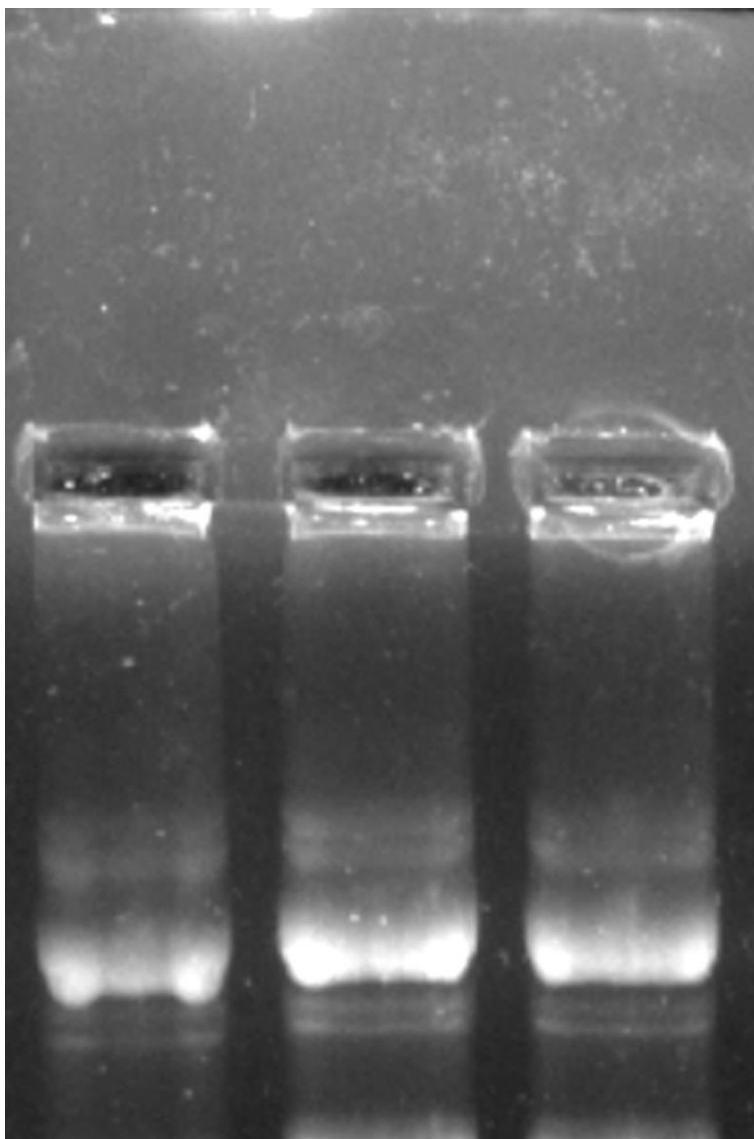

**Supplemental Fig. S7:** Full length photograph of 1.8% agarose gel with TNF- $\alpha$  expression as PCR product of isolated cardiomyocytes after electrophoresis.

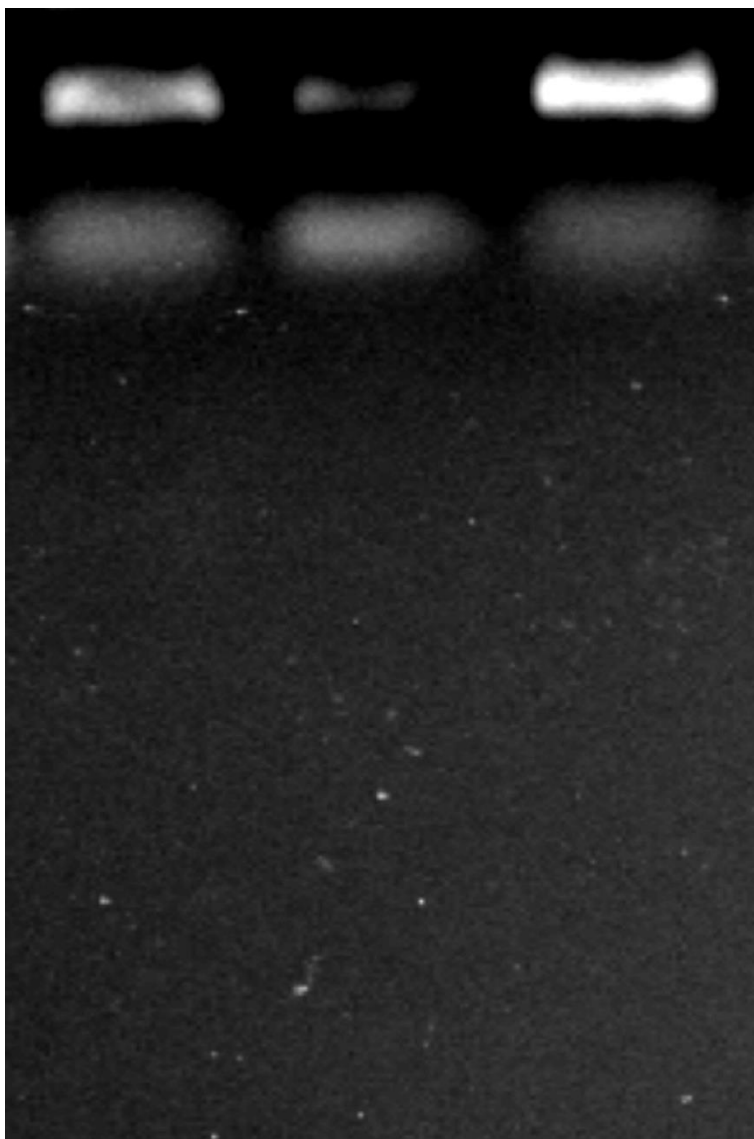

**Supplemental Fig. S8:** Full length photograph of 1.8% agarose gel with eNOS expression as PCR product of isolated cardiomyocytes after electrophoresis.



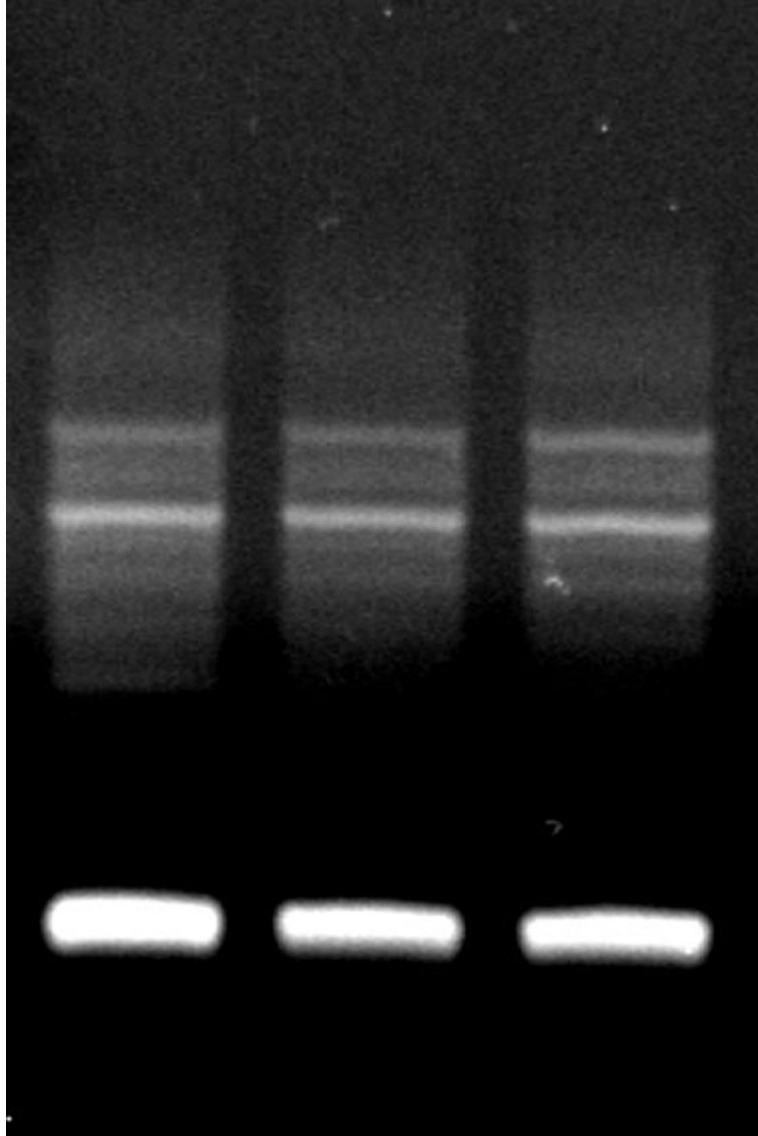

**Supplemental Fig. S9:** Full length photograph of 1.8% agarose gel with iNOS expression as PCR product of isolated cardiomyocytes after electrophoresis.

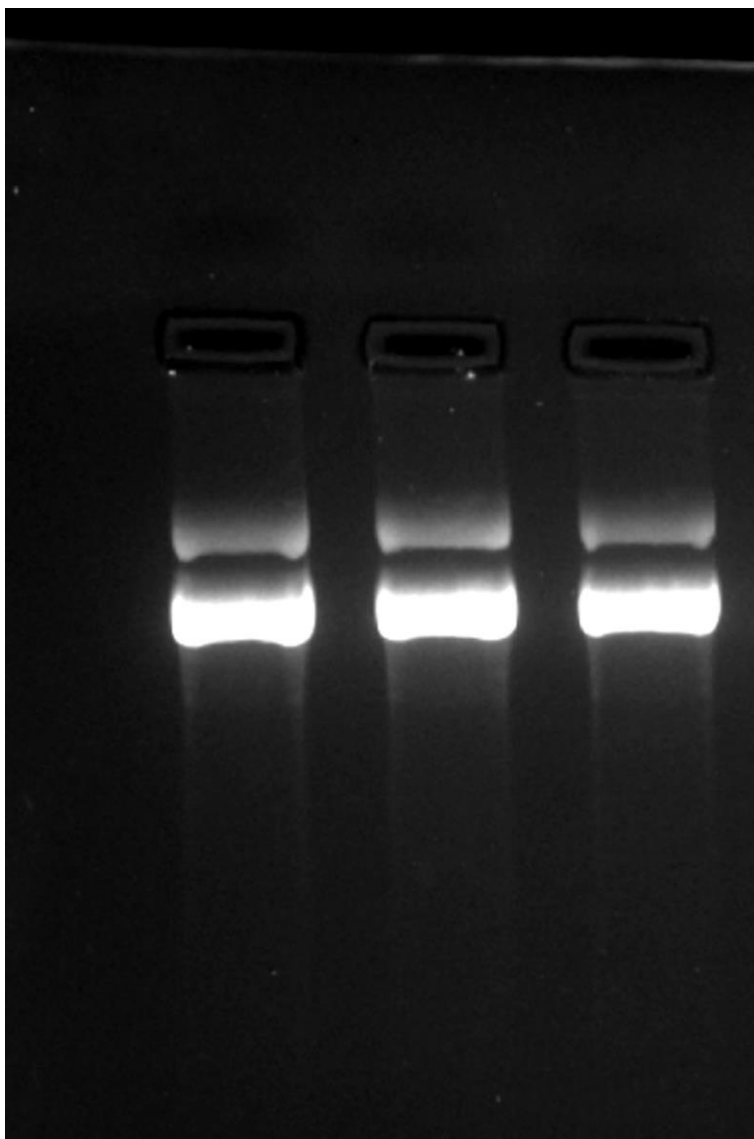

**Supplemental Fig. S10:** Full length photograph of 1.8% agarose gel with  $\beta$ -actin expression as PCR product of isolated cardiomyocytes after electrophoresis.

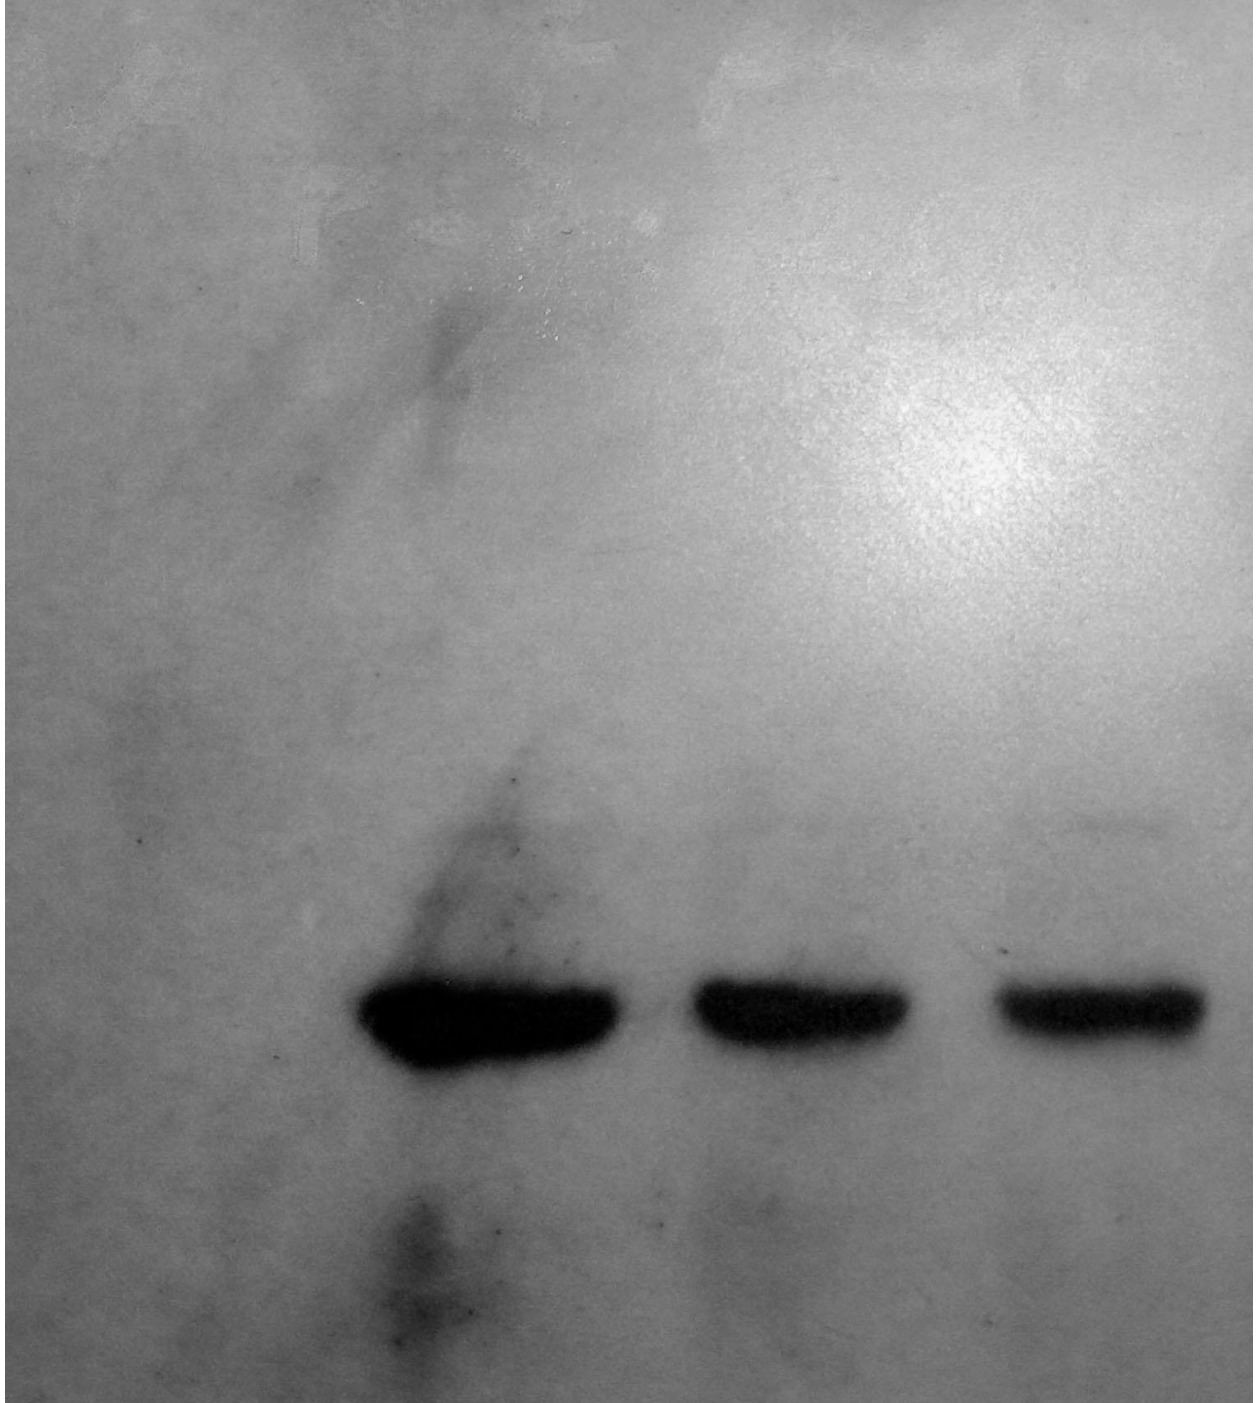

**Supplemental Fig. S11:** Full length photograph of western blot image with Bcl2 expression of isolated hepatocytes.

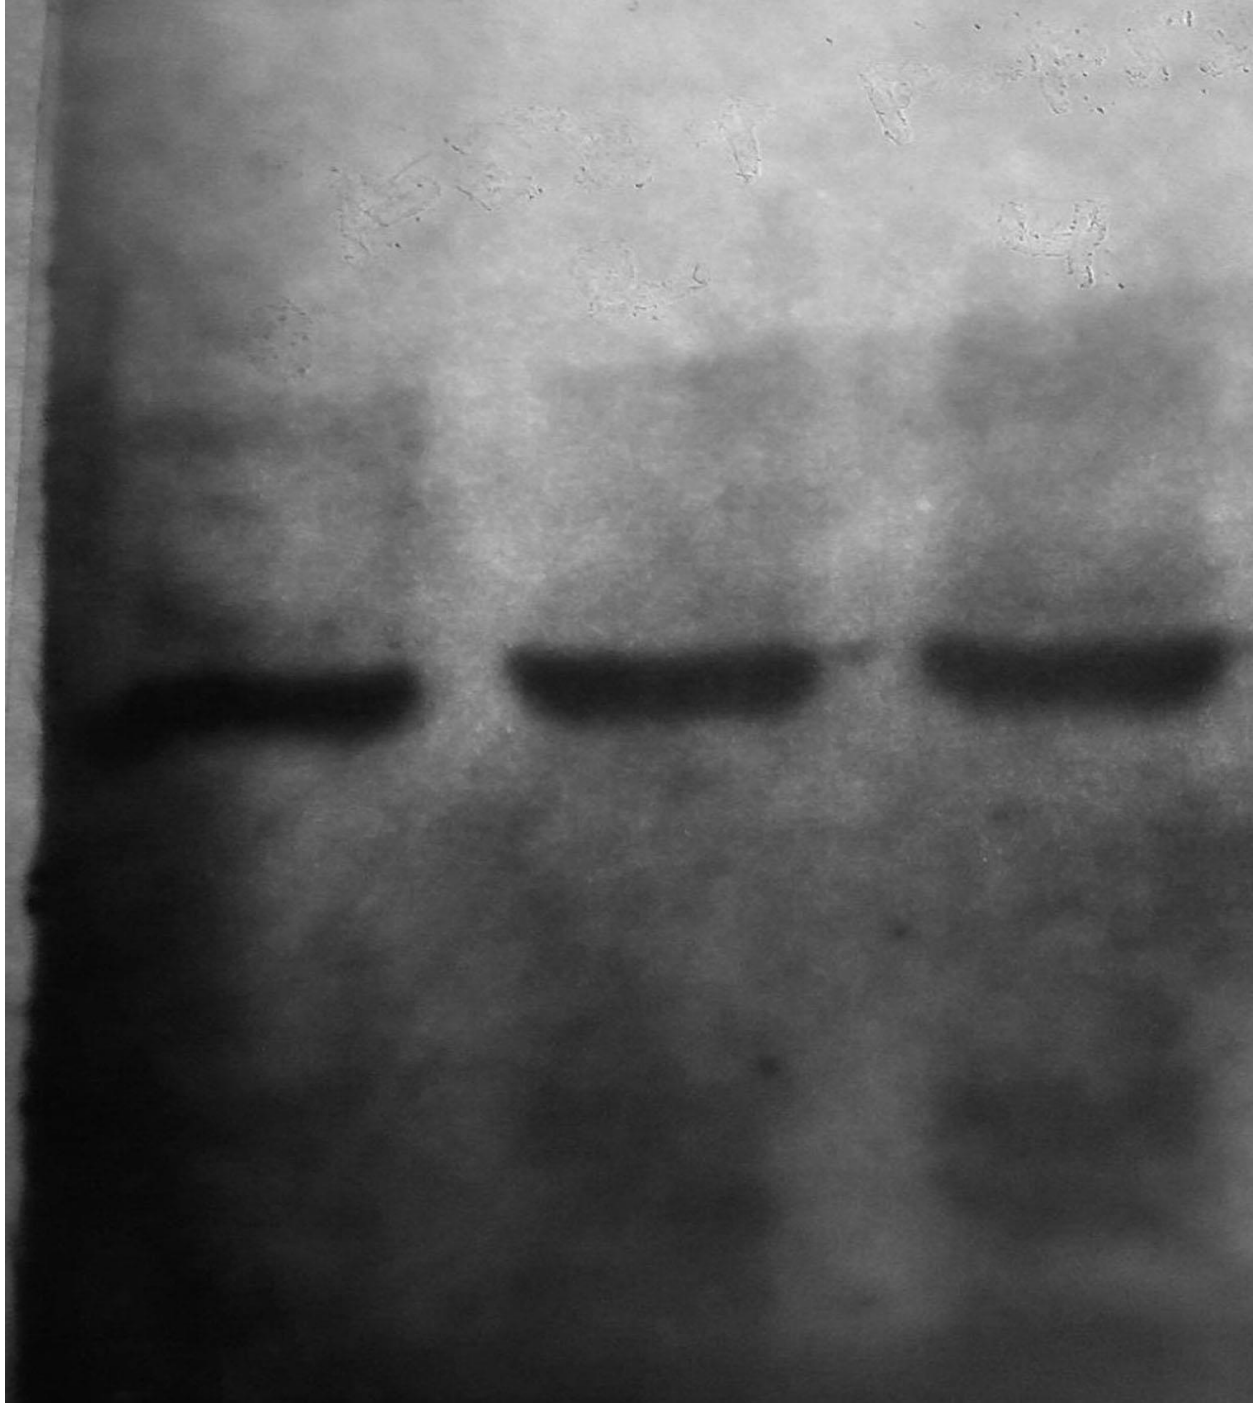

**Supplemental Fig. S12:** Full length photograph of western blot image with Cleaved caspase 9 expression of isolated hepatocytes.

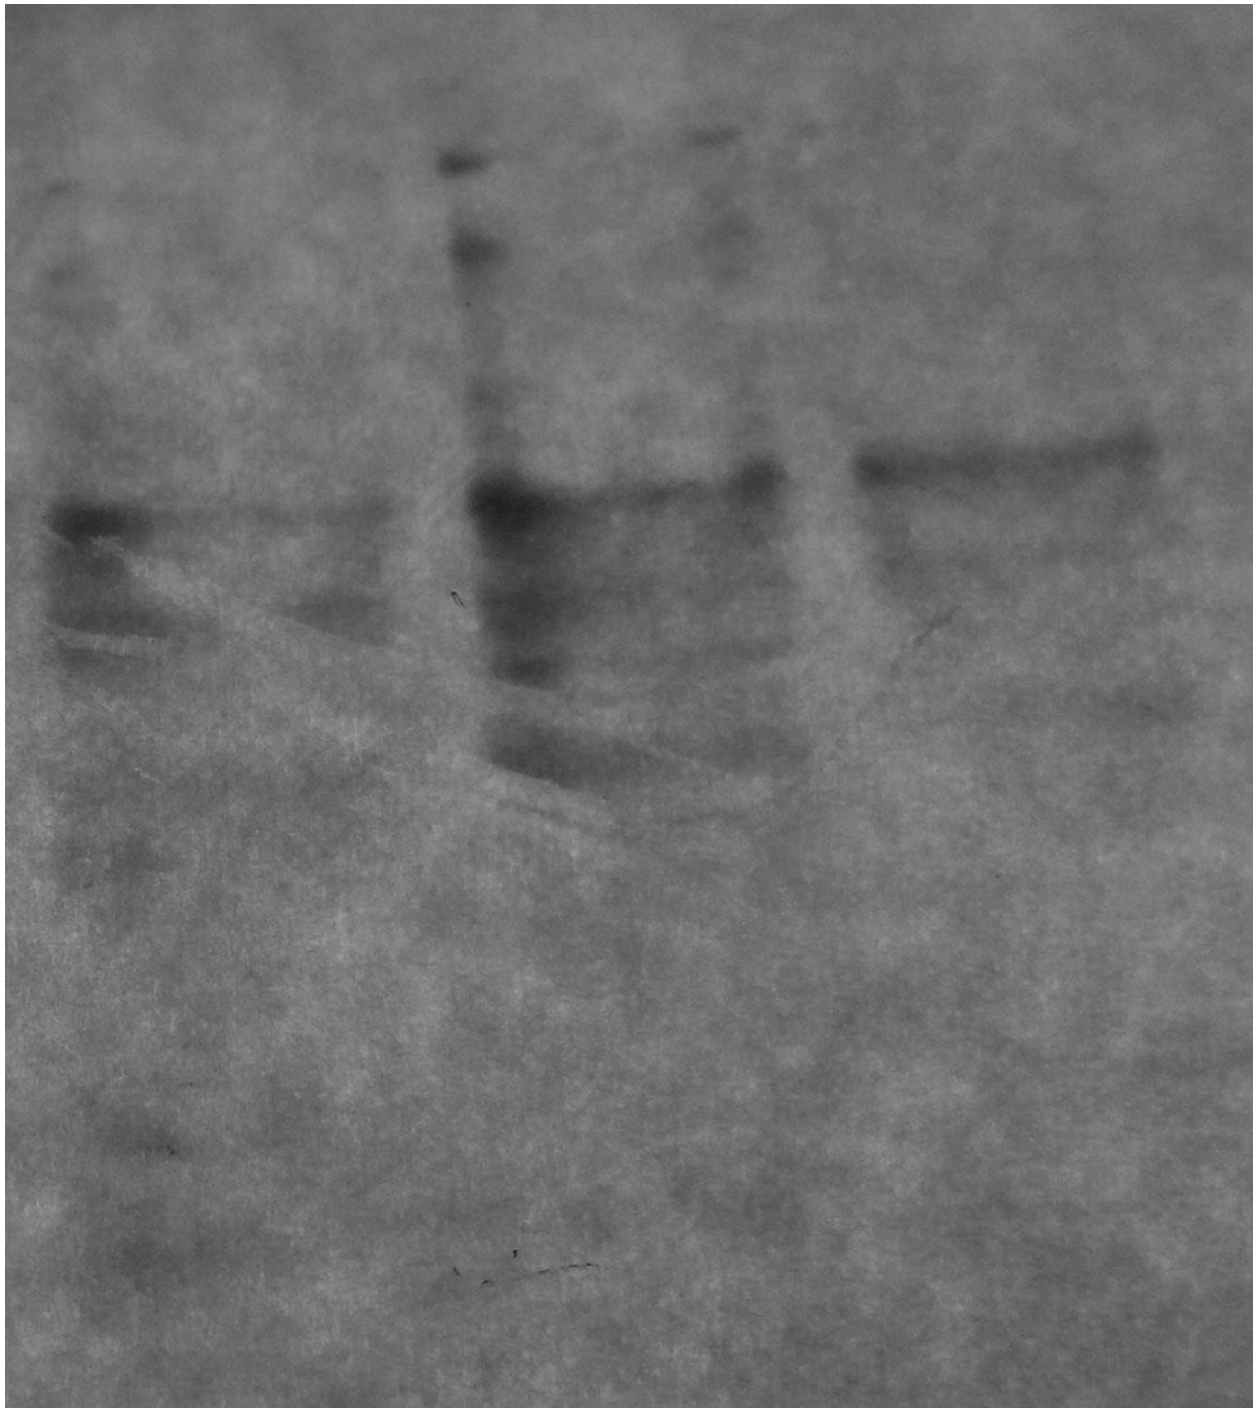

**Supplemental Fig. S13:** Full length photograph of western blot image with p21 expression of isolated hepatocytes.

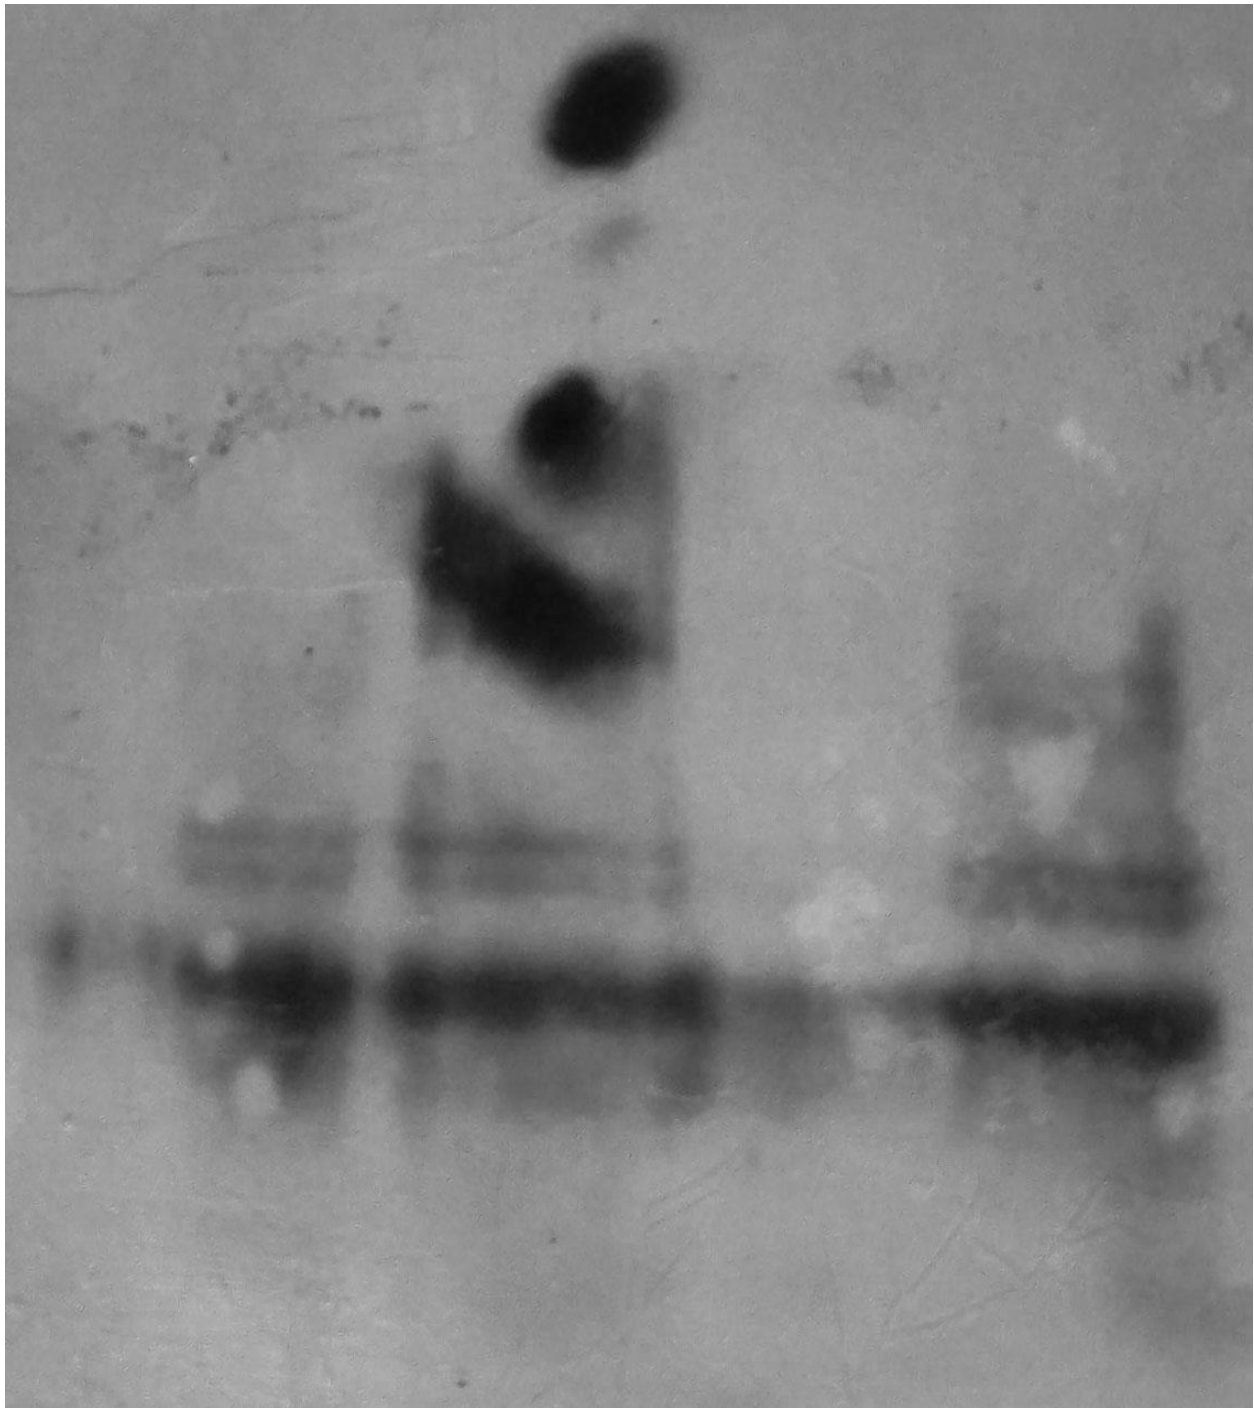

**Supplemental Fig. S14:** Full length photograph of western blot image with p53 expression of isolated hepatocytes.

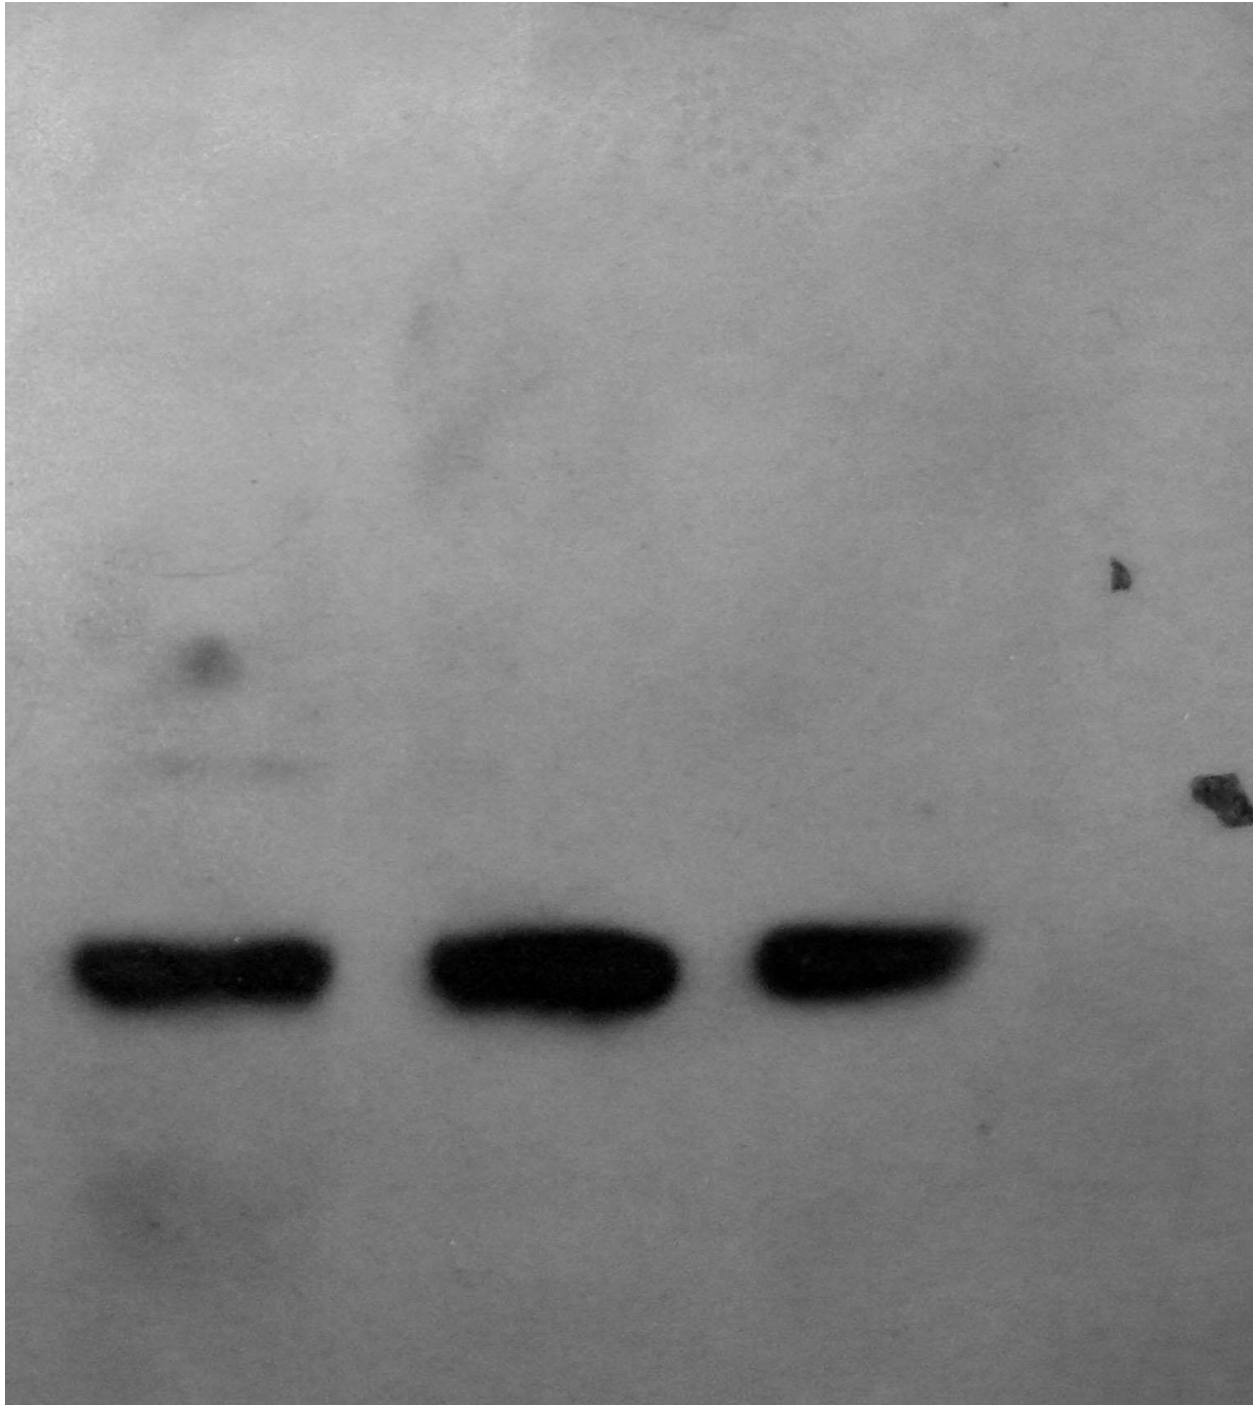

**Supplemental Fig. S15:** Full length photograph of western blot image with Cleaved caspase 3 expression of isolated hepatocytes.



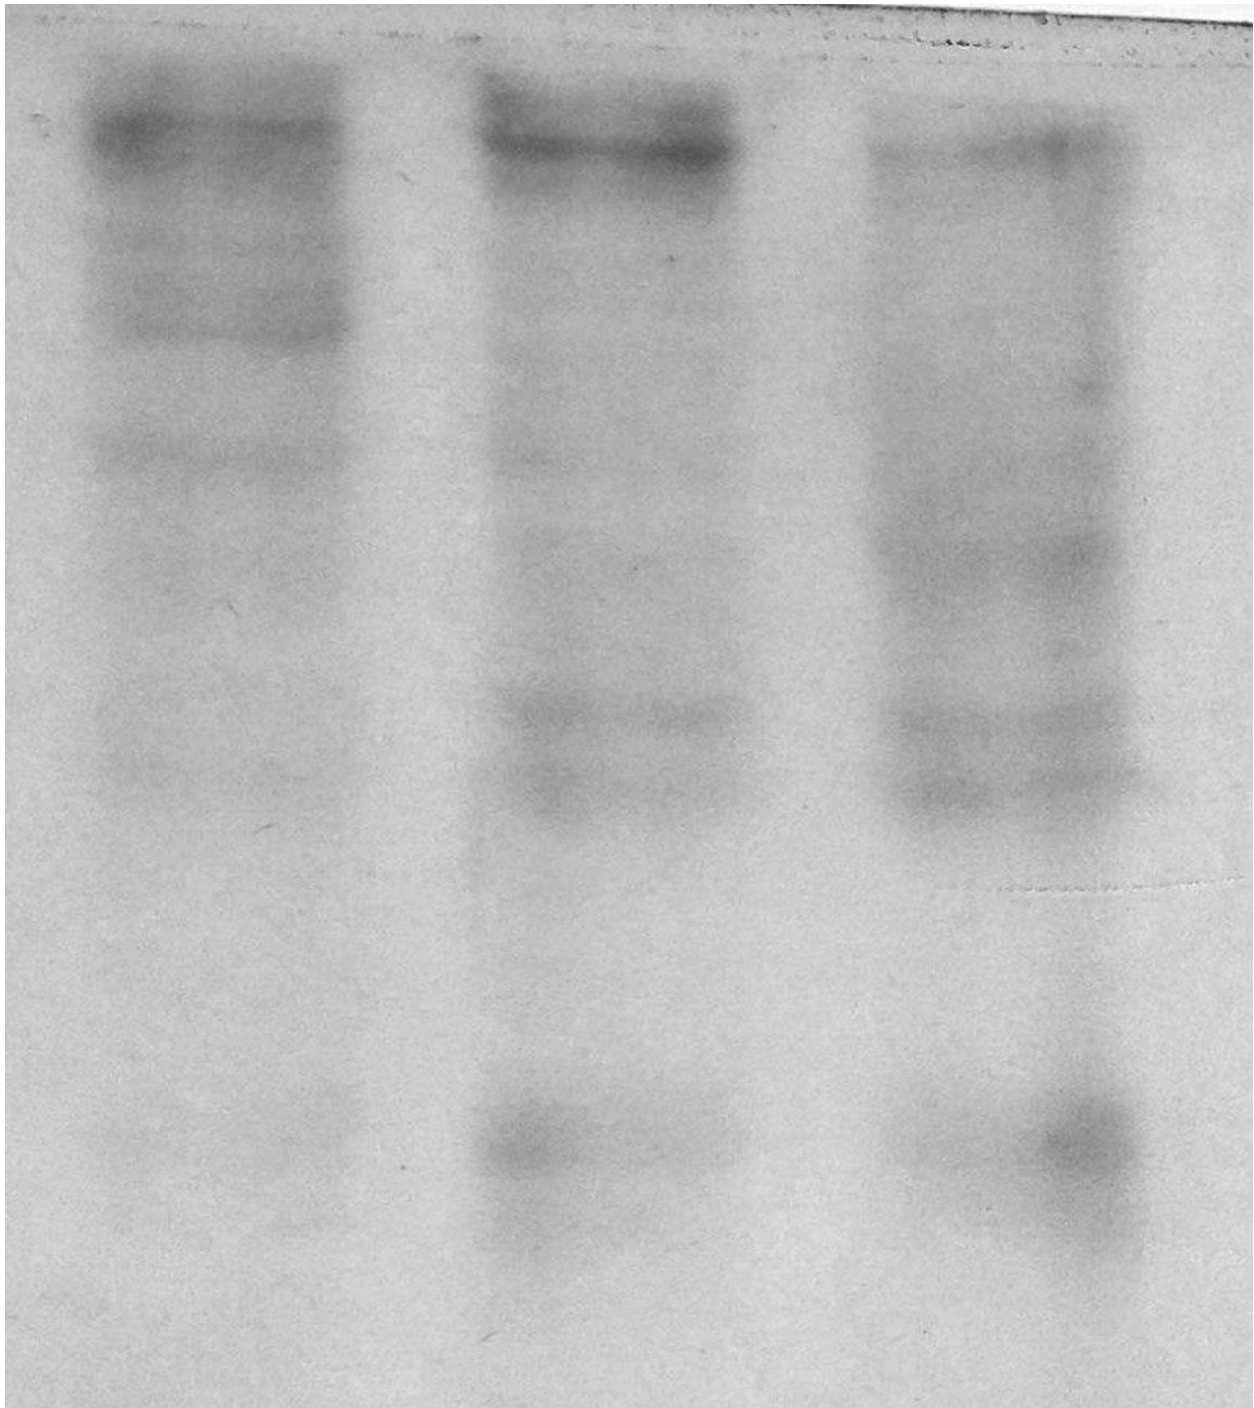

**Supplemental Fig. S16:** Full length photograph of western blot image with Bax expression of isolated hepatocytes.



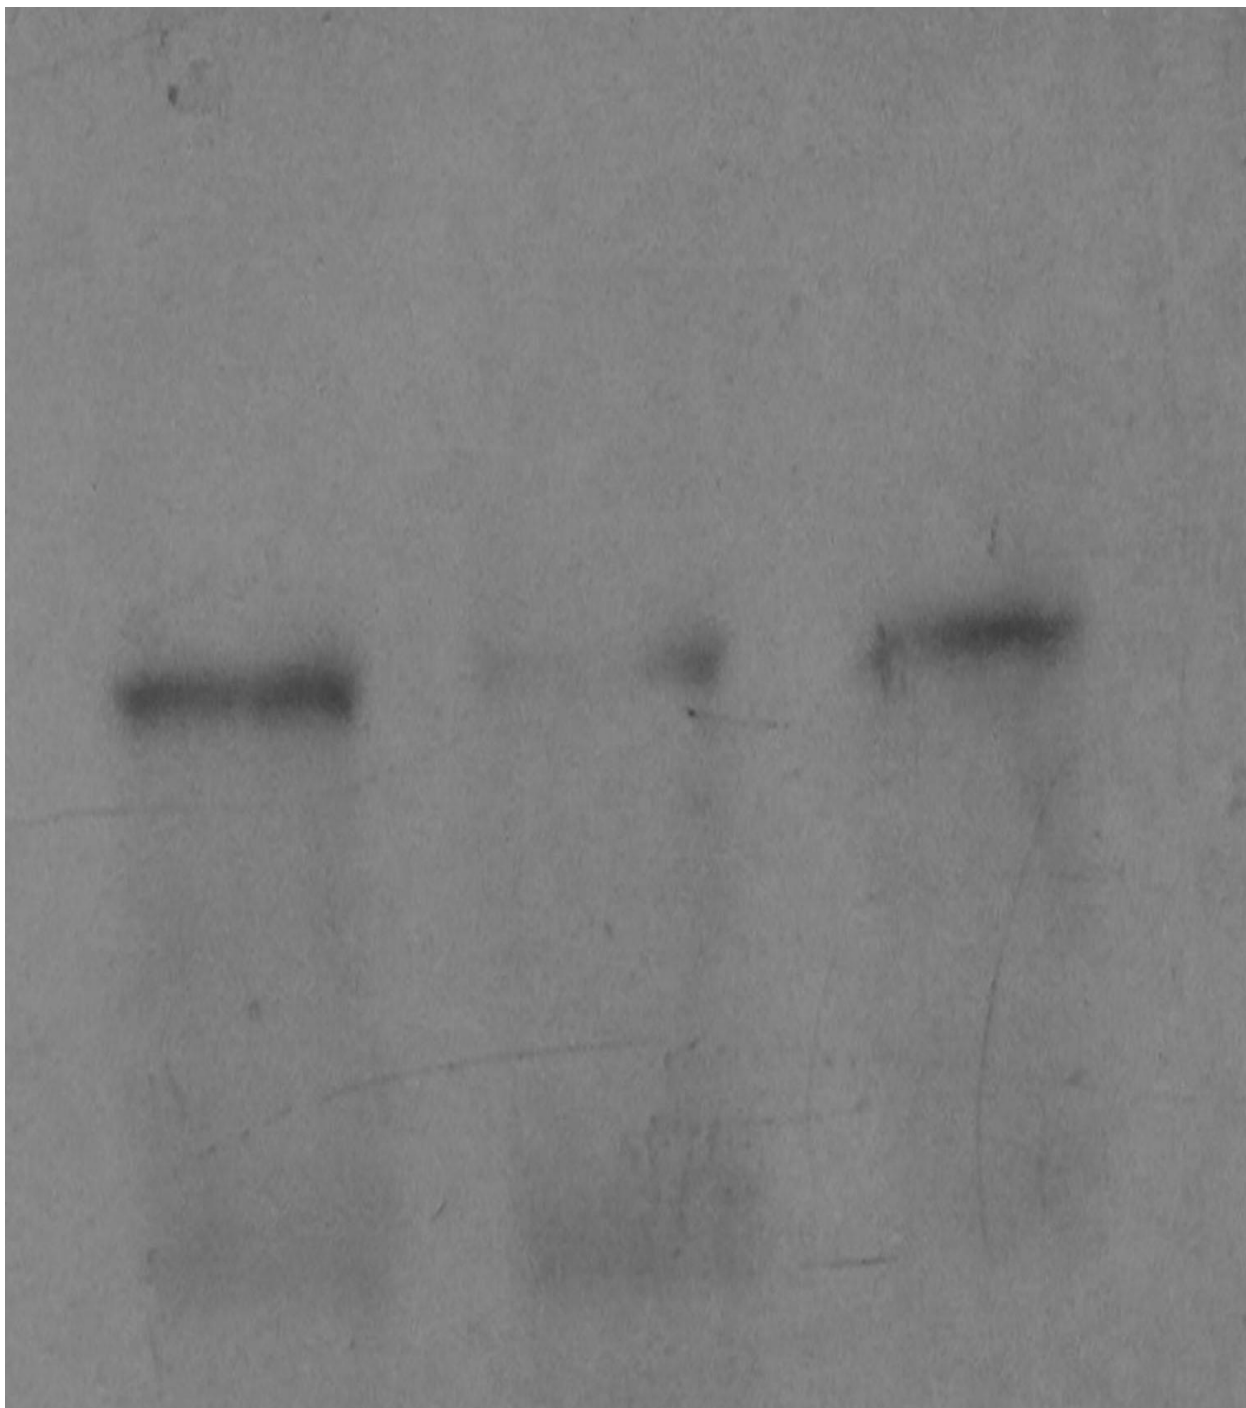

**Supplemental Fig. S17:** Full length photograph of western blot image with PPAR- $\alpha$  expression of isolated hepatocytes.

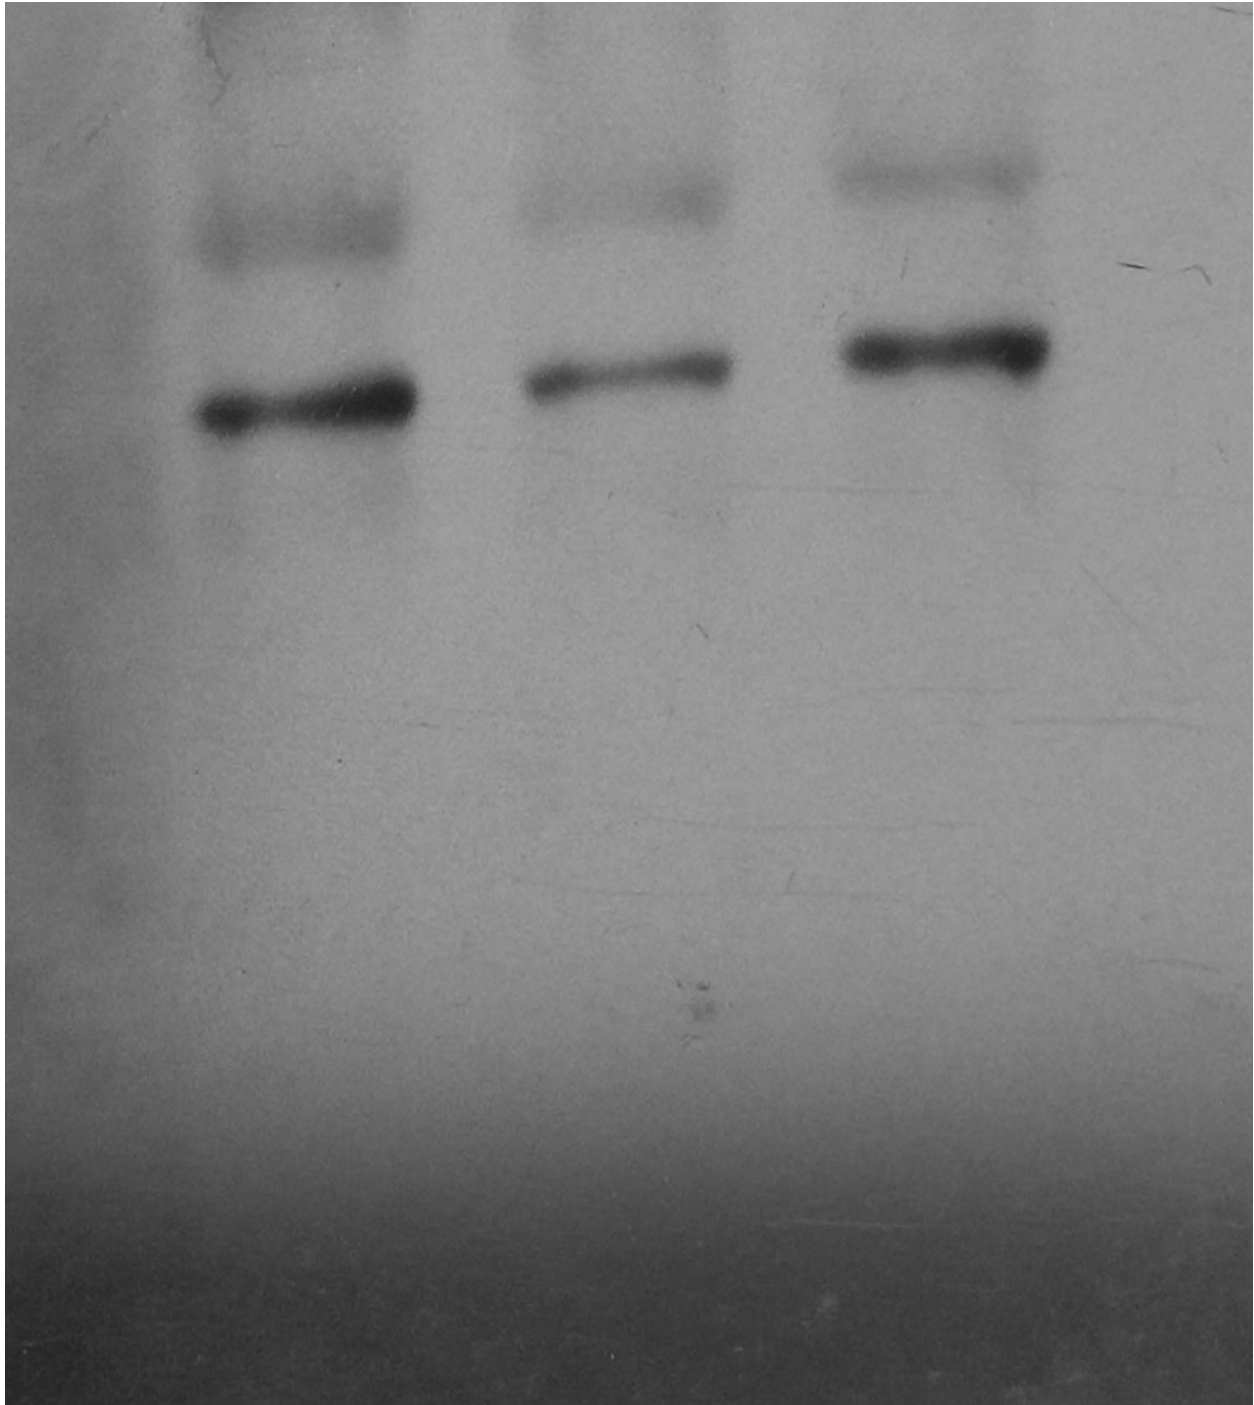

**Supplemental Fig. S18:** Full length photograph of western blot image with PPAR- $\gamma$  expression of isolated hepatocytes.

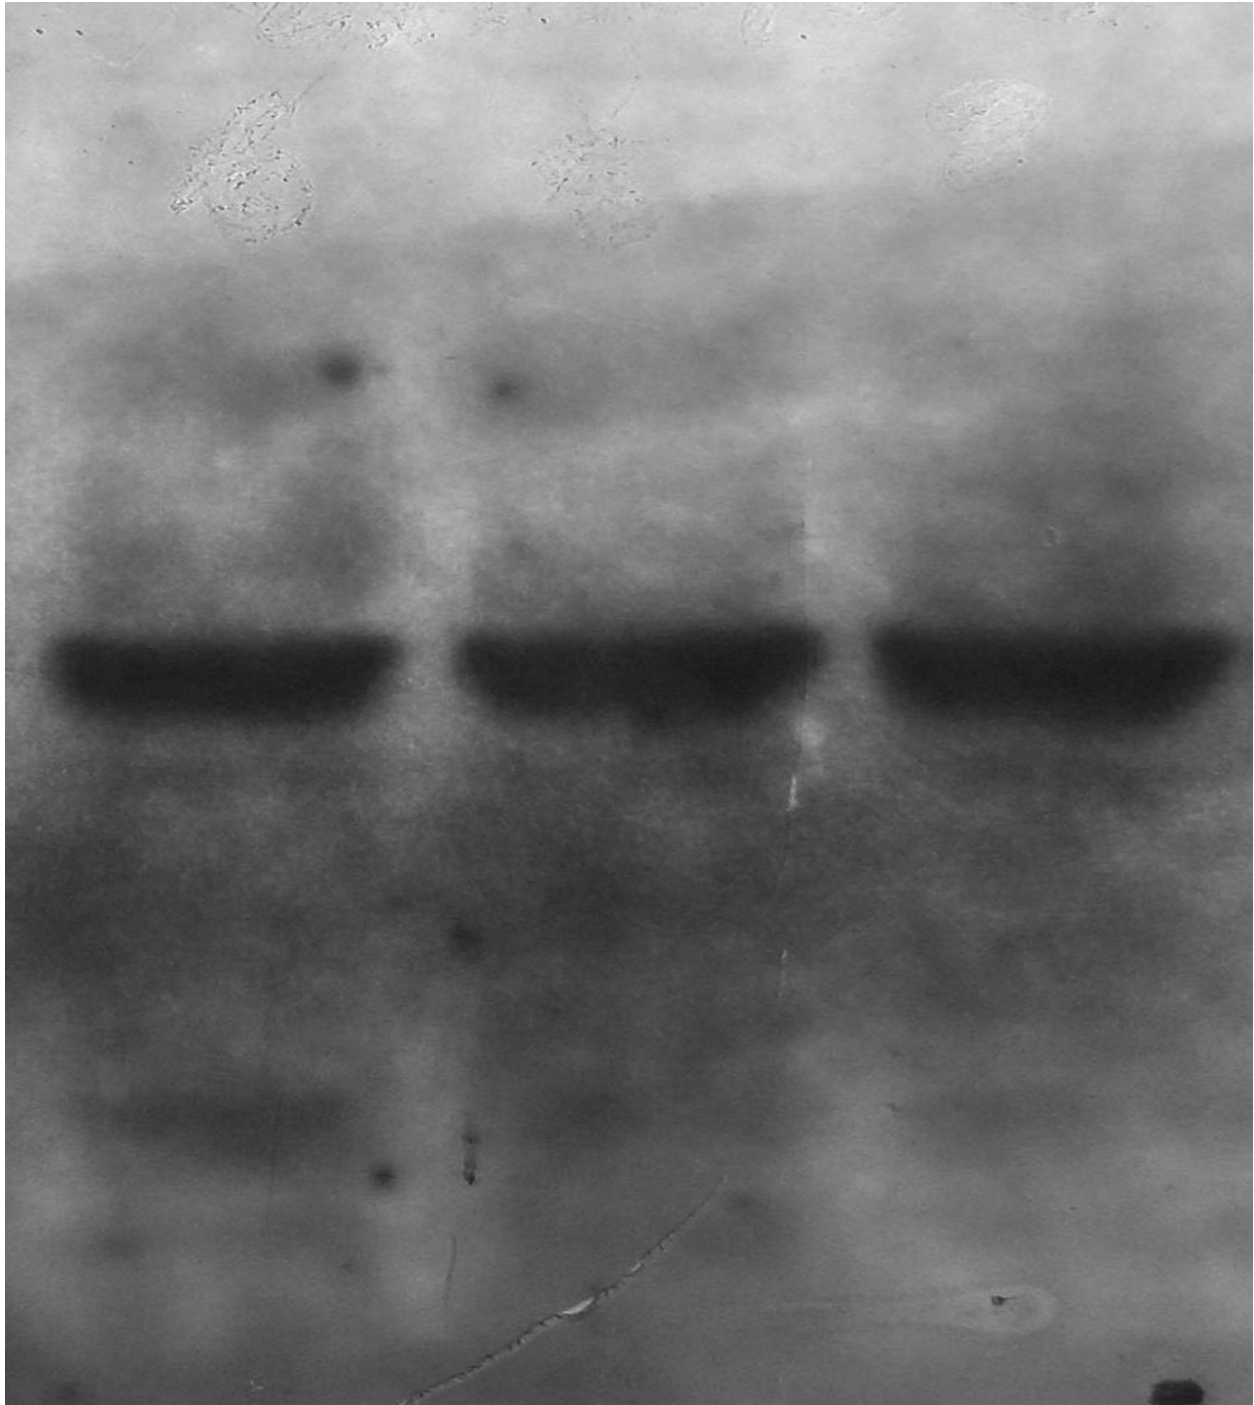

**Supplemental Fig. S19:** Full length photograph of western blot image with GAPDH expression of isolated hepatocytes.

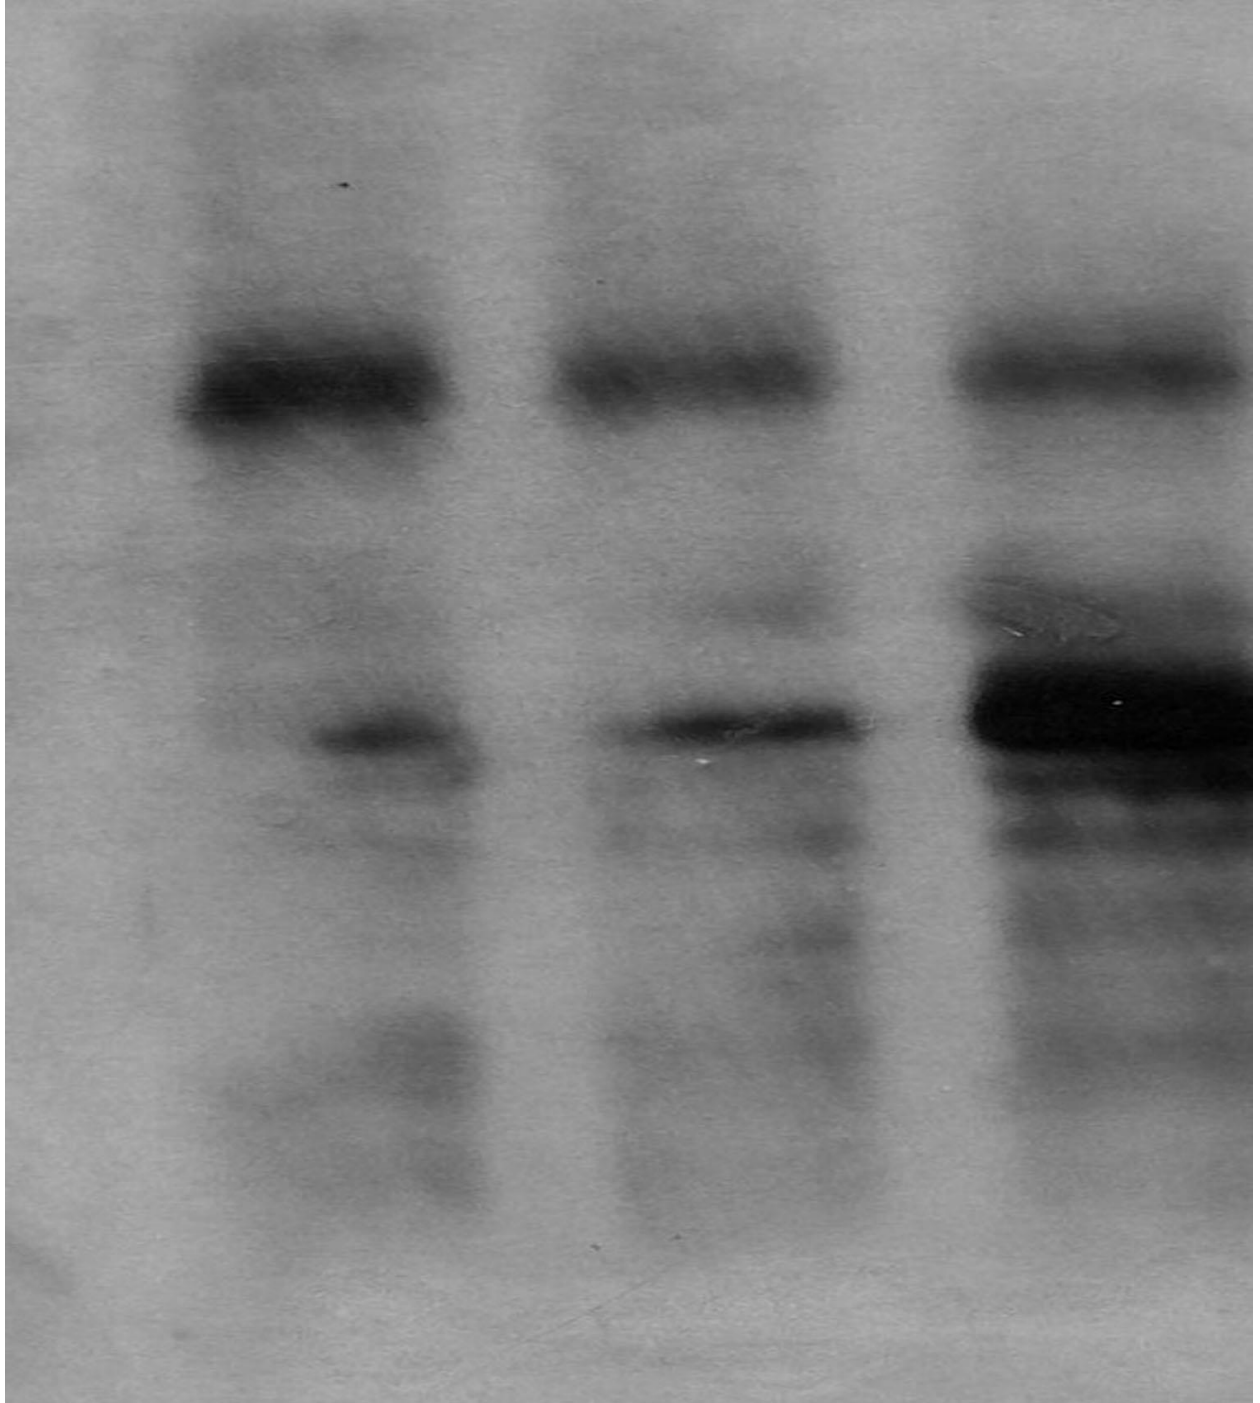

**Supplemental Fig. S20:** Full length photograph of western blot image with Bcl2 expression of isolated cardiomyocytes.

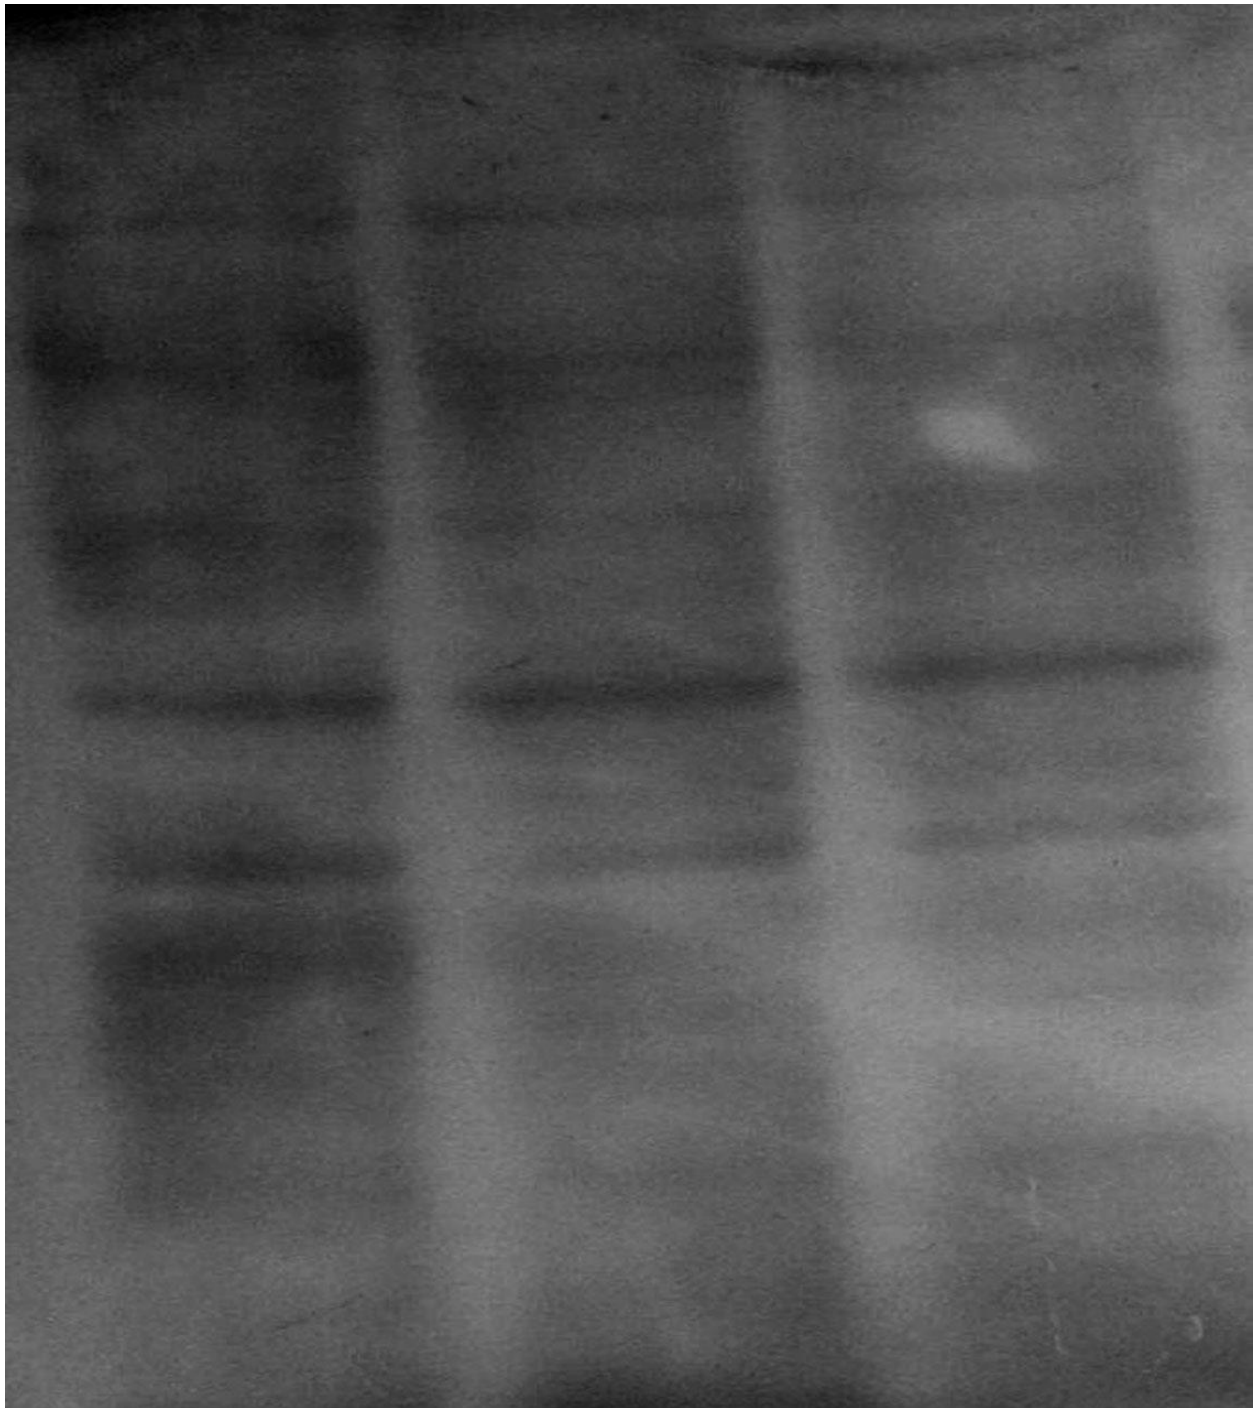

**Supplemental Fig. S21:** Full length photograph of western blot image with p53 expression of isolated cardiomyocytes.

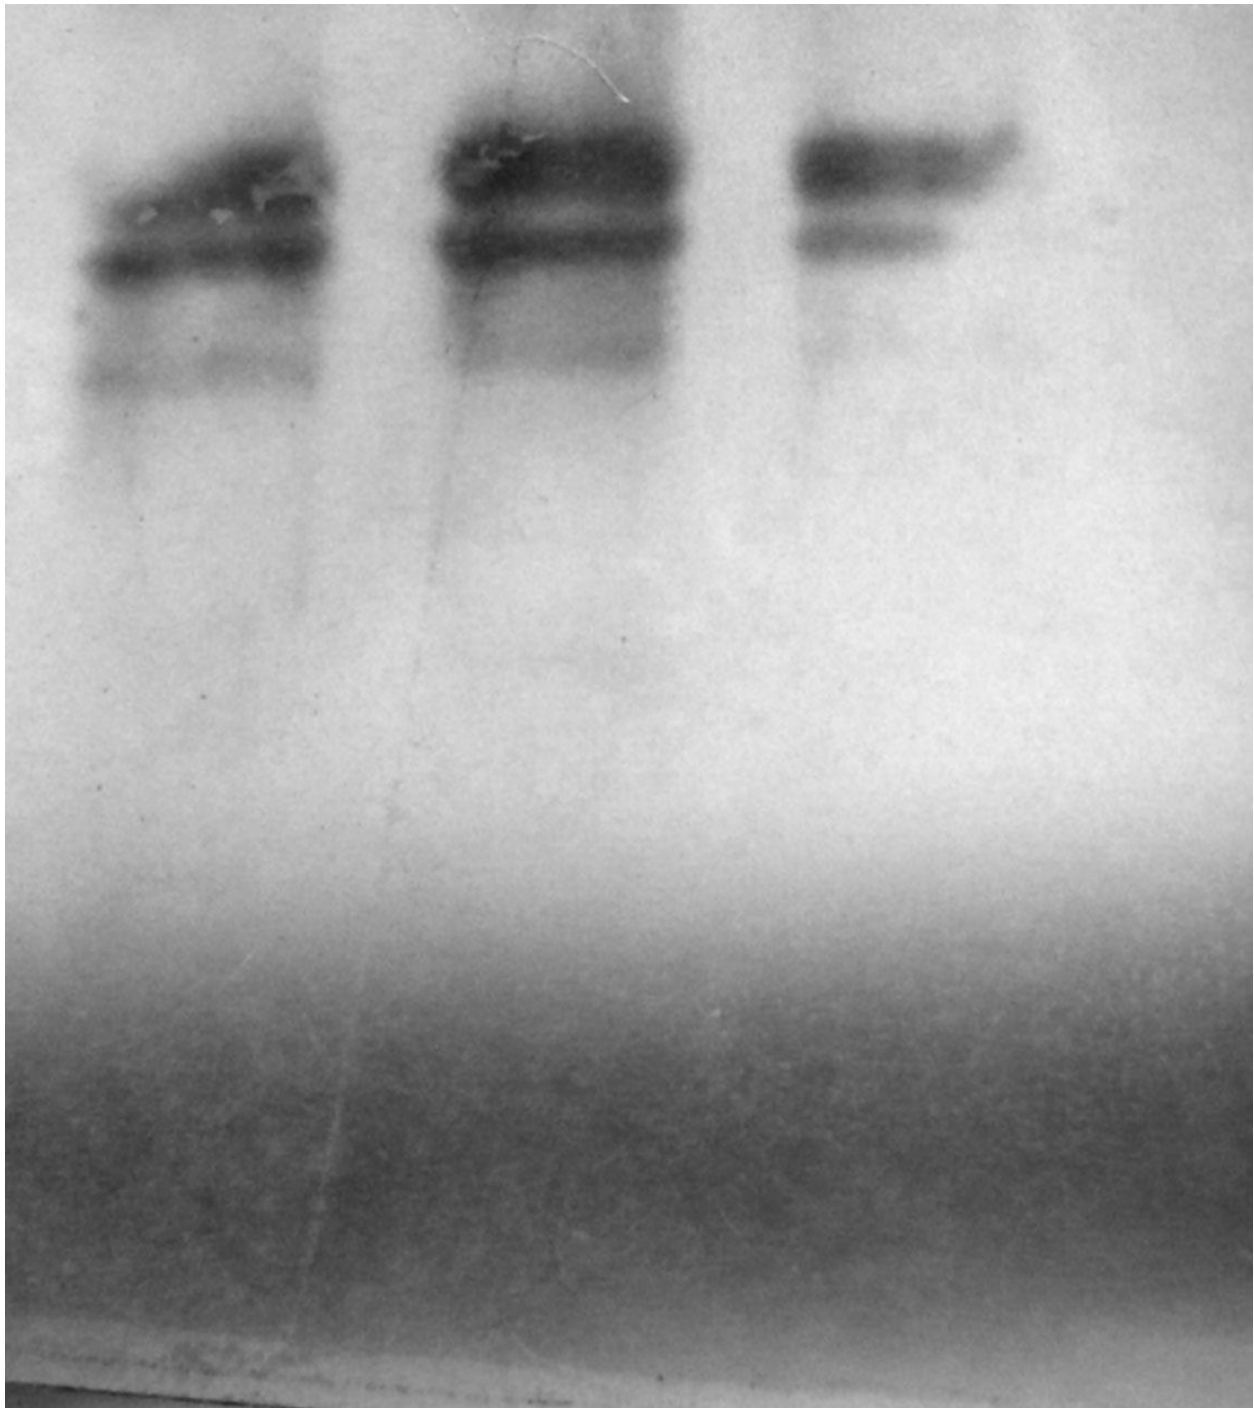

**Supplemental Fig. S22:** Full length photograph of western blot image with Cleaved caspase 9 expression of isolated cardiomyocytes.

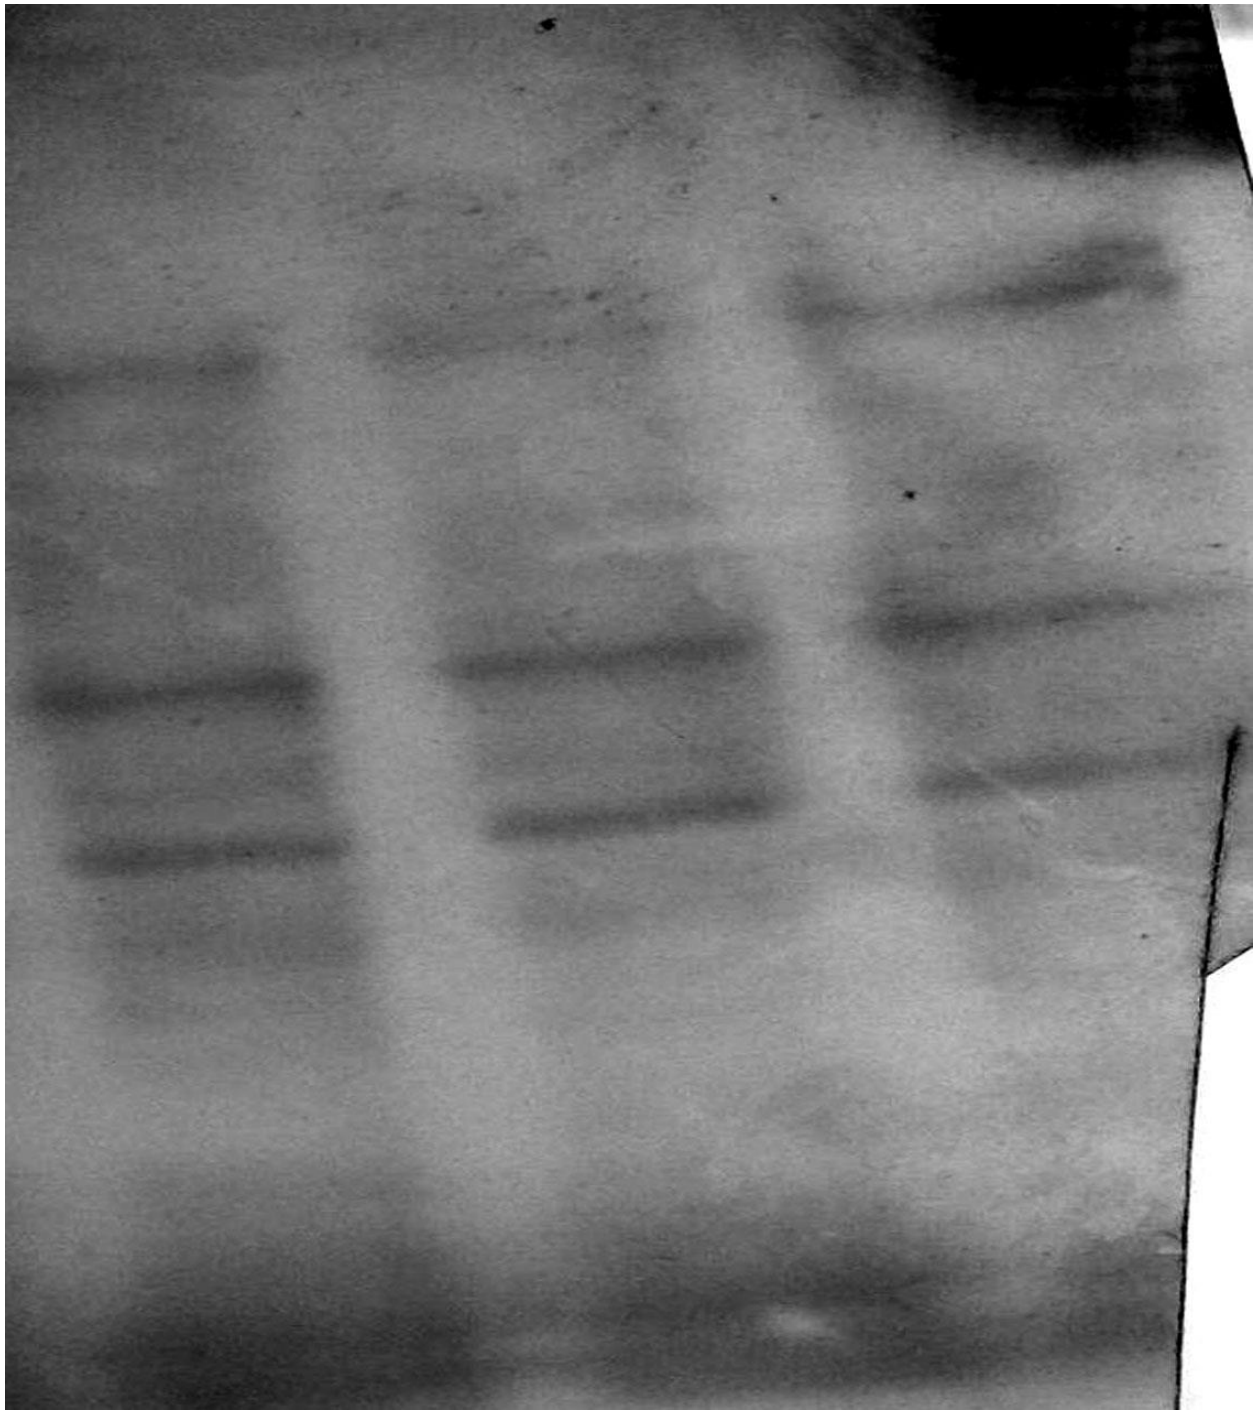

**Supplemental Fig. S23:** Full length photograph of western blot image with p21 expression of isolated cardiomyocytes.



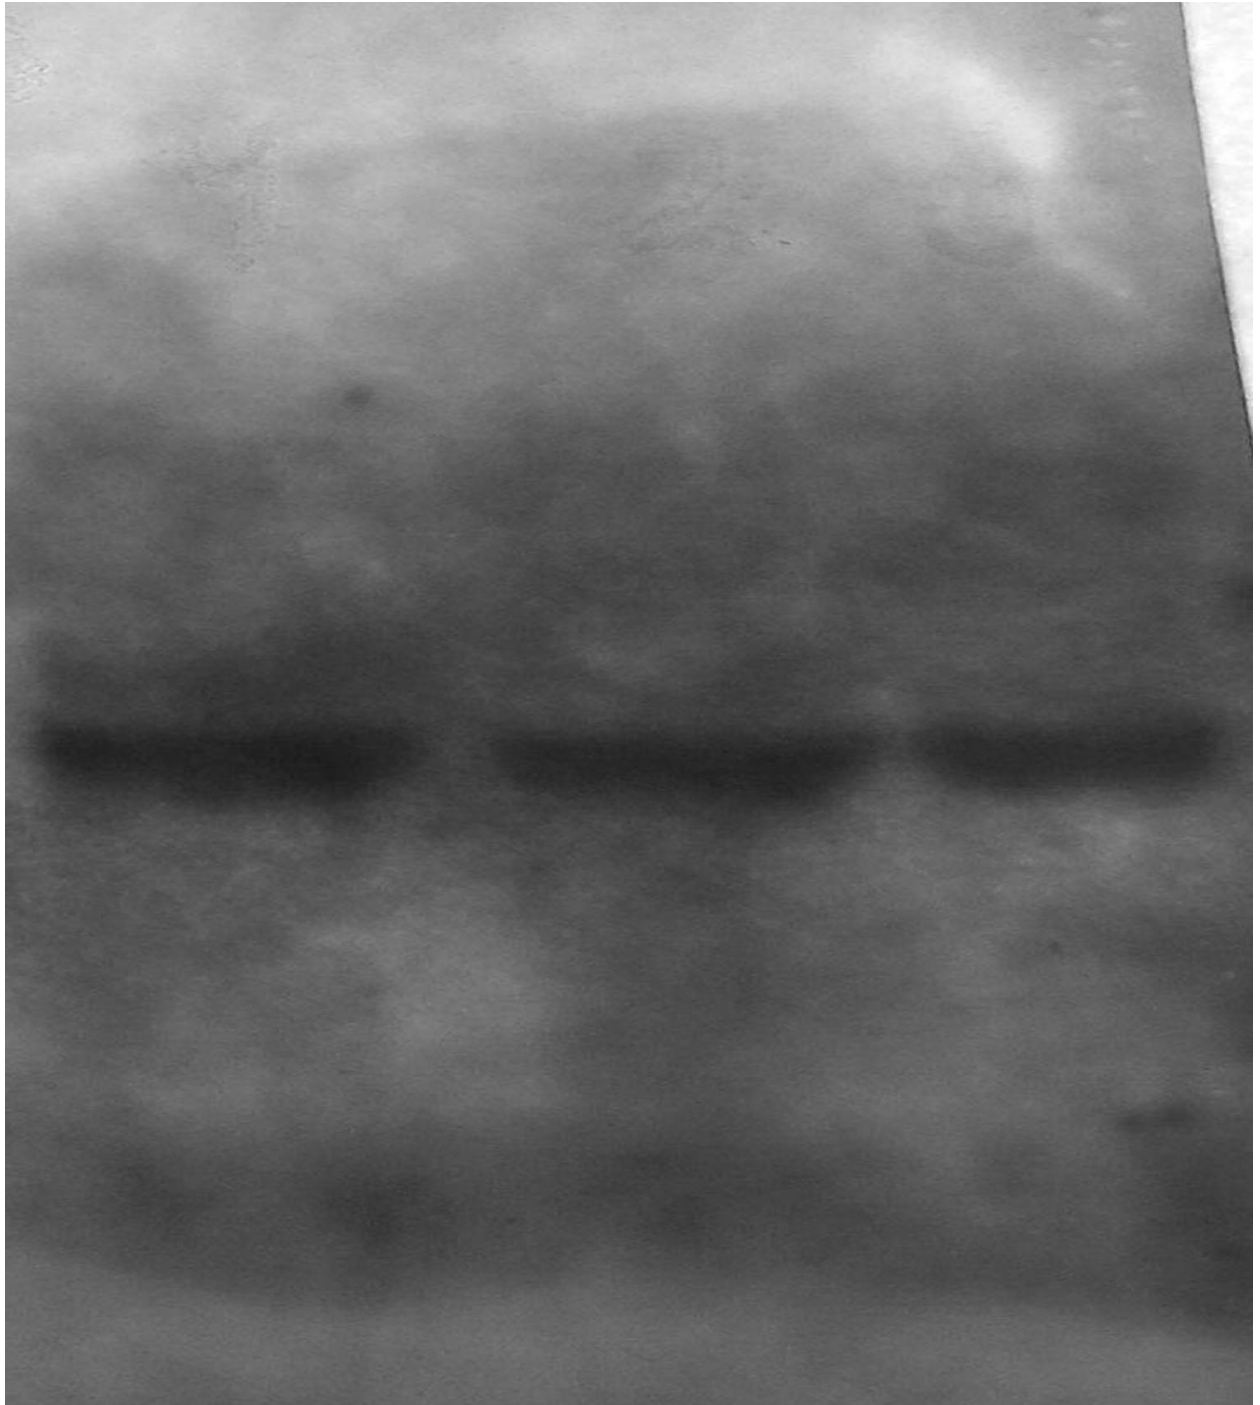

**Supplemental Fig. S24:** Full length photograph of western blot image with Cleaved caspase 3 expression of isolated cardiomyocytes.



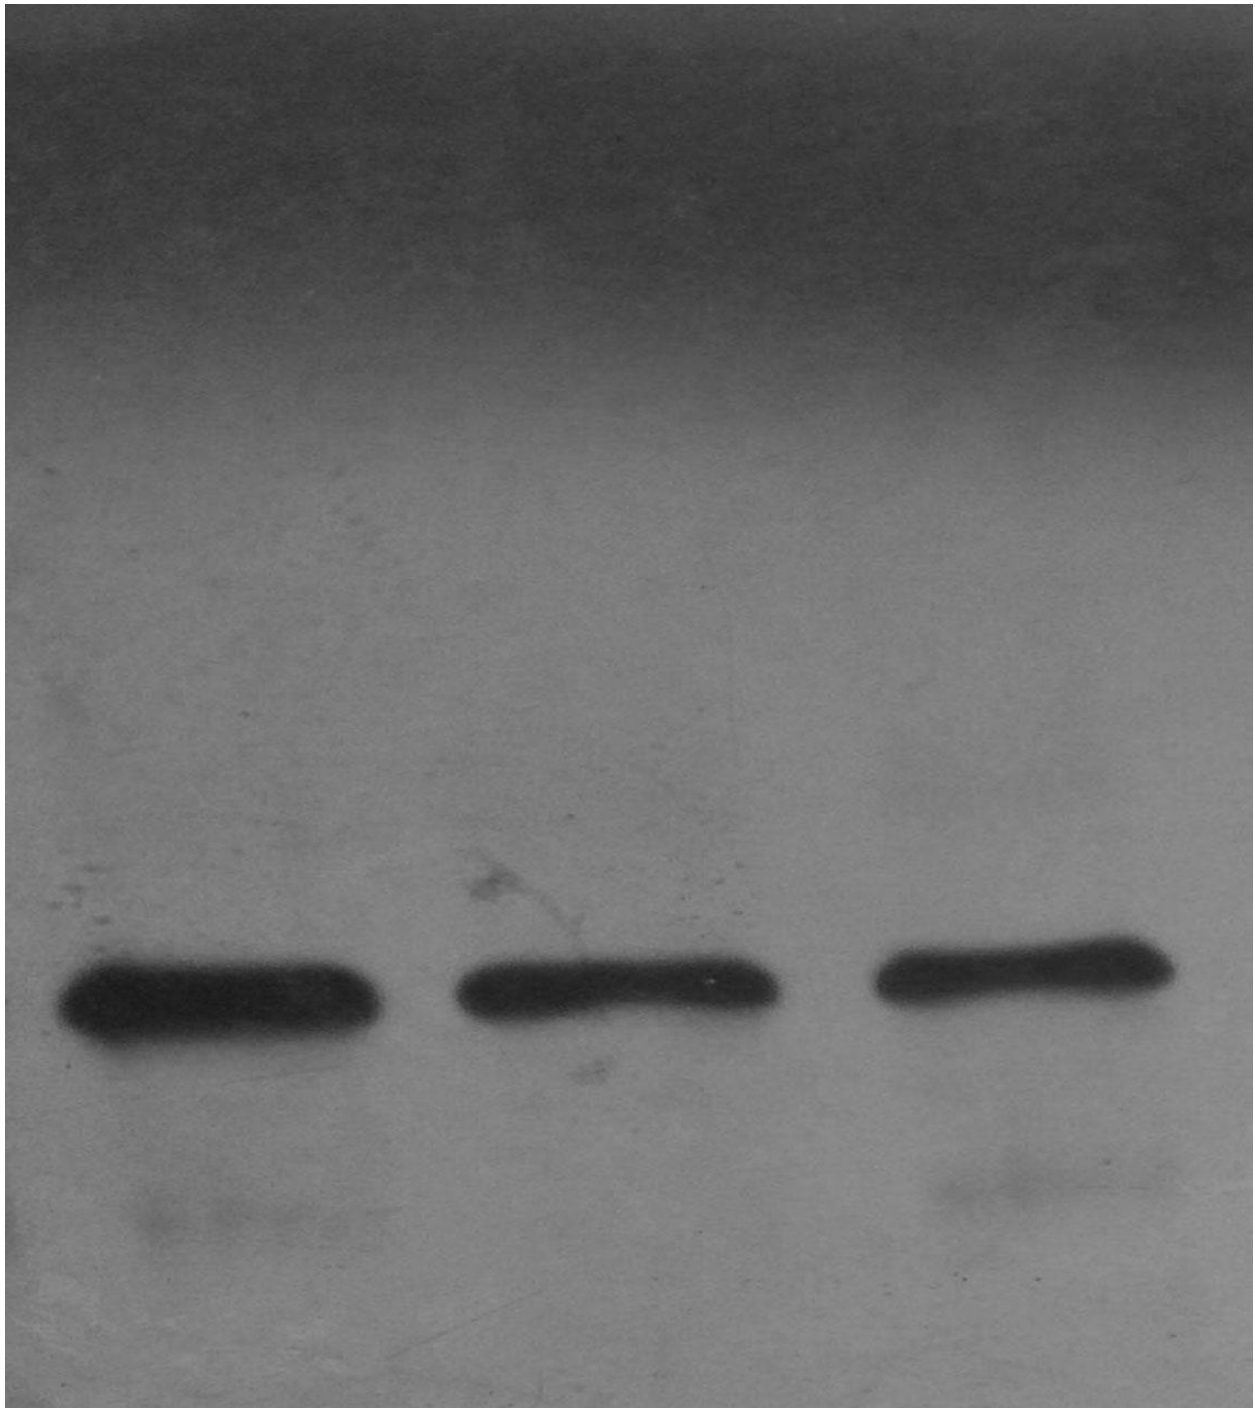

**Supplemental Fig. S25:** Full length photograph of western blot image with Bax expression of isolated cardiomyocytes.

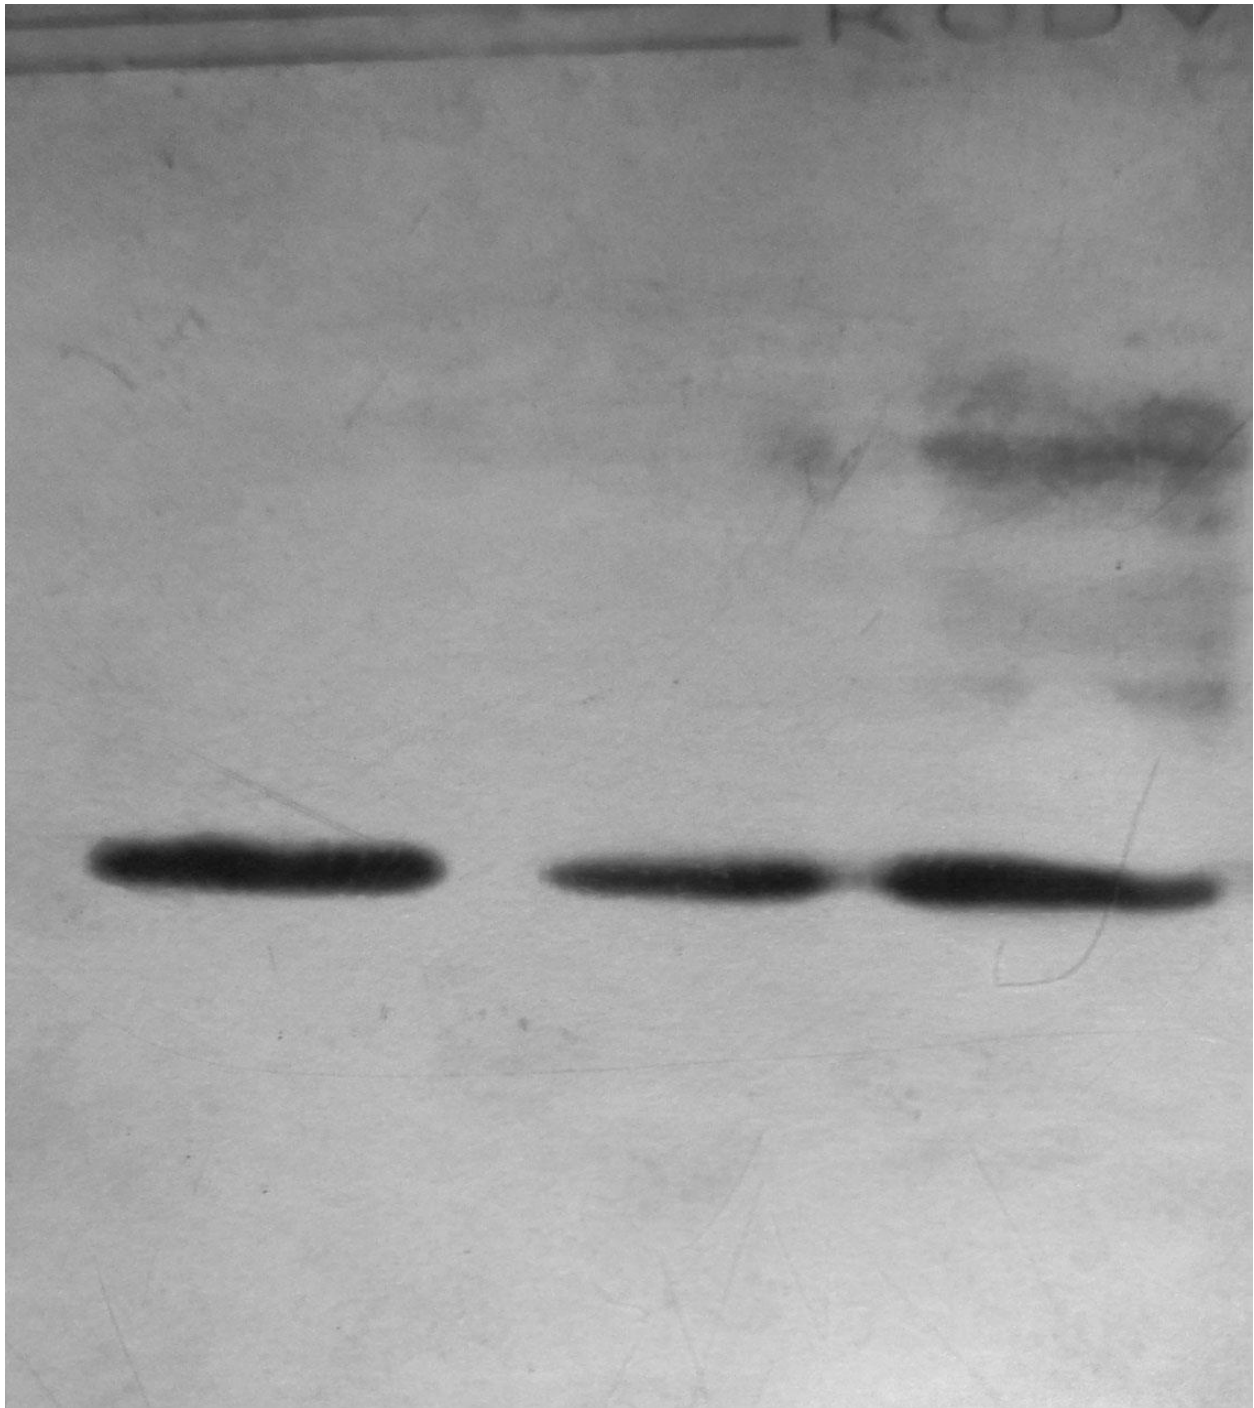

**Supplemental Fig. S26:** Full length photograph of western blot image with PPAR- $\alpha$  expression of isolated cardiomyocytes.

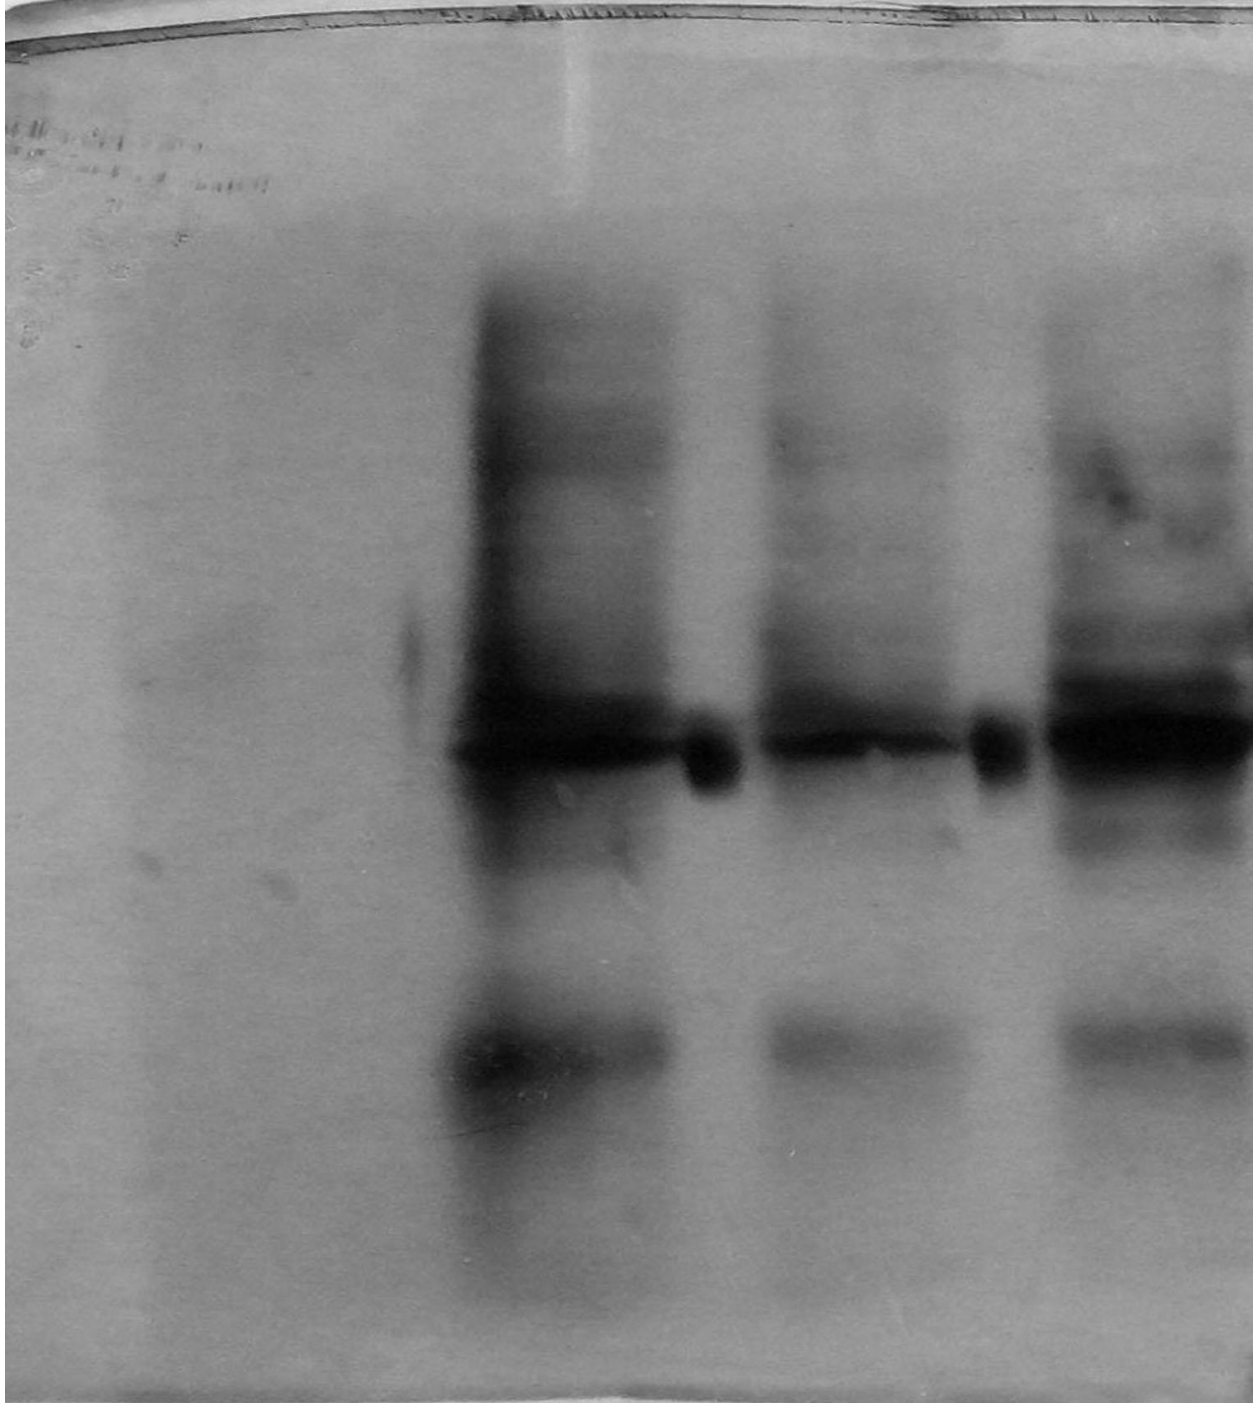

**Supplemental Fig. S27:** Full length photograph of western blot image with PPAR- $\gamma$  expression of isolated cardiomyocytes.

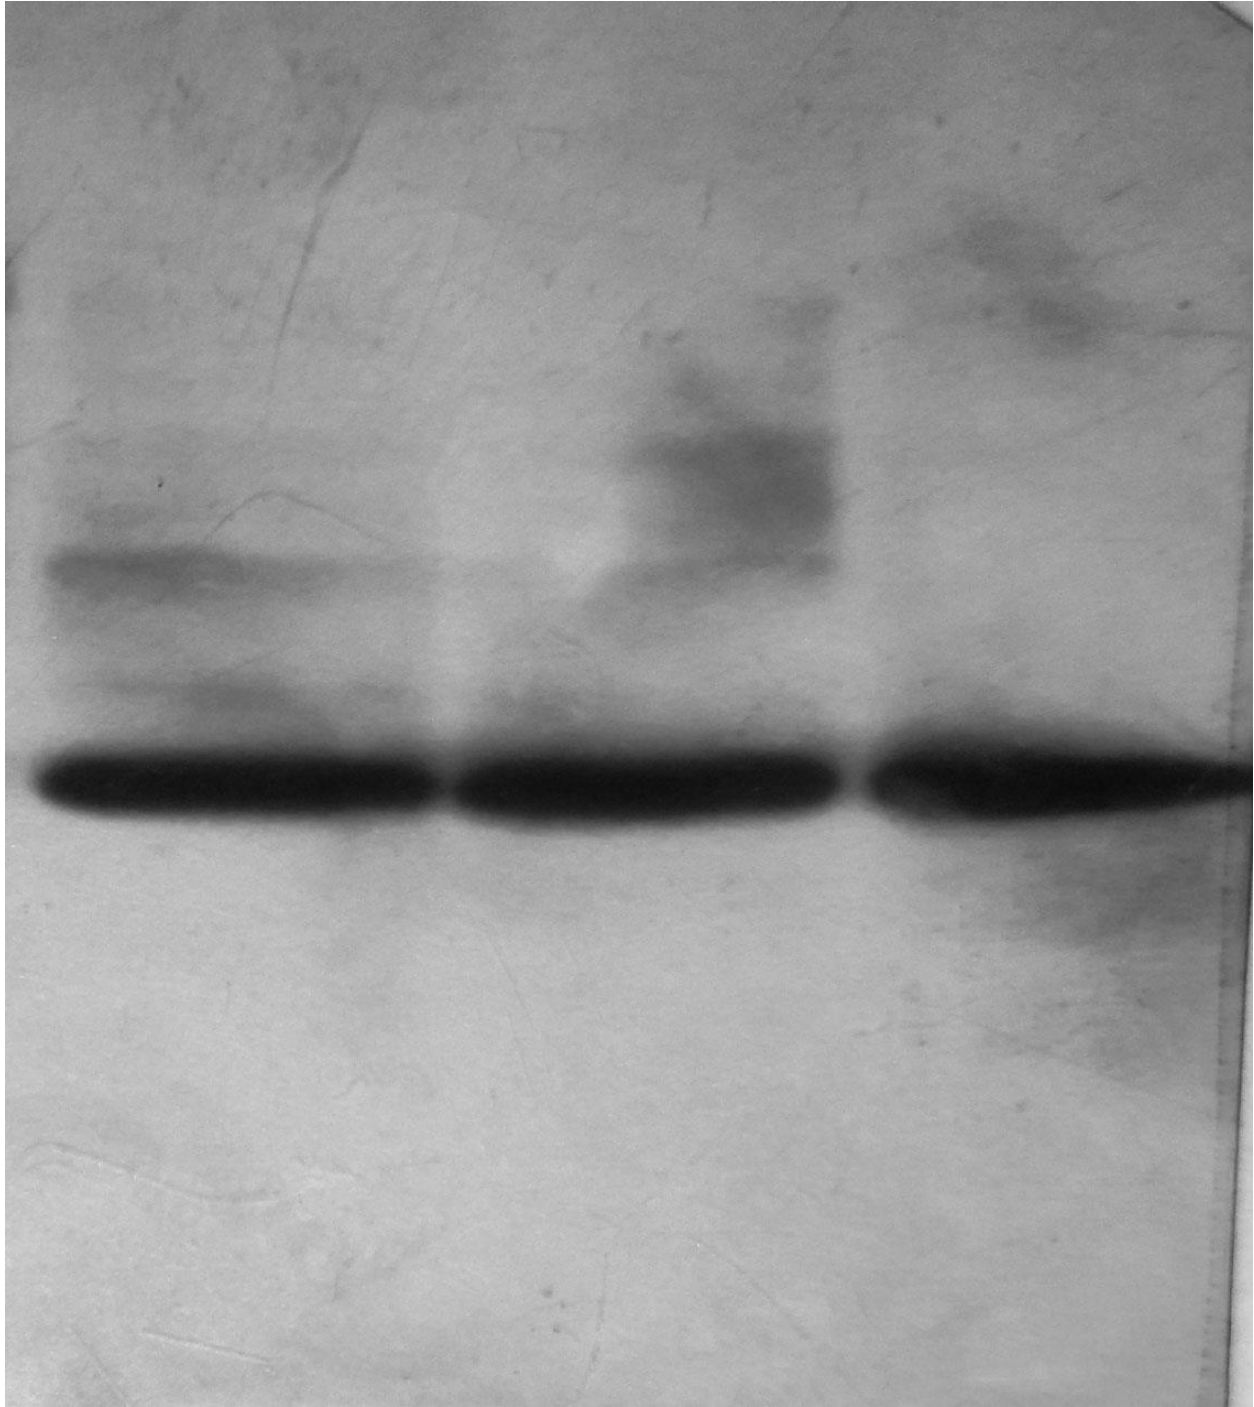

**Supplemental Fig. S28:** Full length photograph of western blot image with GAPDH expression of isolated cardiomyocytes.
